1 **A neuronal ensemble encoding adaptive choice during sensory conflict**

2 Preeti Sareen<sup>1</sup>, Li Yan McCurdy<sup>1</sup>, Michael N. Nitabach<sup>1, 2, 3, \*</sup>

3

4 <sup>1</sup>Department of Cellular & Molecular Physiology, Yale University, New Haven, CT, USA

5 <sup>2</sup>Department of Genetics, Yale University, New Haven, CT, USA

6 <sup>3</sup>Department of Neuroscience, Yale University, New Haven, CT, USA

7

8

9

10 \*corresponding author: [michael.nitabach@yale.edu](mailto:michael.nitabach@yale.edu)

11

12

13

14

15

16

17

18

19

20

21

22

23

24

25

26

27 **Abstract**

28 Feeding decisions are fundamental to survival, and decision making is often disrupted in disease<sup>1,2</sup>,  
29 yet the neuronal and molecular mechanisms of adaptive decision making are not well understood. Here  
30 we show that the neural activity in a small population of neurons projecting to the fan-shaped body in the  
31 central brain of *Drosophila* represents food choice during sensory conflict. We found that hungry flies  
32 made tradeoffs between appetitive and aversive values of food in a decision making task to choose  
33 unpalatable bittersweet food with high sucrose concentration over sucrose-only food with less sucrose.  
34 Using cell-specific optogenetics and receptor RNAi knockdown during the decision task, we identified an  
35 upstream neuropeptidergic and dopaminergic network that likely relays internal state and other decision  
36 relevant information, like valence and previous experience, to the fan-shaped body. Importantly, calcium  
37 imaging revealed that these fan-shaped body neurons were strongly inhibited by rejected food choice,  
38 suggesting that this neural activity is a representation of behavioral choice. FB response to food choice is  
39 modulated by taste, previous experience, and hunger state, which the fan-shaped body neurons likely  
40 integrate to encode choice before relaying decision information to downstream motor circuits for  
41 behavioral implementation. Our results uncover a neural substrate for choice encoding in a genetically  
42 tractable model to enable mechanistic dissection of decision making at neuronal, cellular, and molecular  
43 levels.

44  
45 **Keywords:** decision making, conflicting sensory context, value integration, internal state, central  
46 complex, fan-shaped body

47

48

49

50

51

52

53 **Main**

54 Animals integrate food-related sensory information from their external environment with their  
55 internal state in order to make adaptive decisions. Often food-related sensory information is conflicting in  
56 valence. For example, *Drosophila* flies forage on decomposing fruits and, when hungry, must balance  
57 obtaining essential nutrition with avoiding toxins, pathogens, etc. As flies forage, sweet and bitter taste  
58 receptors on their legs and wings signal the presence of sweet nutritive food and bitter potential toxins<sup>3</sup>.  
59 Flies must adaptively weigh and integrate this conflicting information before consumption to enhance  
60 reproductive success. We investigated how value-based decisions are made in the brain of a hungry fly  
61 using an experimental paradigm in which freely walking flies sample and choose between different sweet-  
62 only and bittersweet foods (Fig. 1a). We quantified food choice and manipulated subsets of neurons while  
63 flies engaged in this decision task with conflicting taste information (Fig. 1a).

64 **Hungry flies make tradeoffs when faced with conflicting sensory information**

65 We tested wild-type flies deprived of food for different durations over a range of increasing  
66 concentration of sweet-only (sucrose) option against a constant bittersweet (sucrose + quinine) option.  
67 When choosing between a low sucrose concentration sweet-only option and a high sucrose concentration  
68 bittersweet option, flies prefer higher sucrose bittersweet (Fig. 1b). As sucrose concentration of the sweet-  
69 only choice increased, flies increasingly preferred it over bittersweet. This dose-dependent change in  
70 preference suggests that at higher sucrose concentrations of sweet-only option the caloric advantage in  
71 choosing a less palatable bittersweet food was lost (Fig. 1b). In the absence of bitter, flies always chose  
72 the sweeter option (Extended Data Fig. 1a). Flies equally preferred sweet-only and bittersweet option at  
73 10-fold sucrose concentration difference (Fig. 1b, 50 mM vs. 500 mM sucrose+1 mM quinine). This  
74 equal-preference point was identical at all of the tested food deprivation durations (Fig. 1b). The equal-  
75 preference point depends on the sucrose concentration ratio between the two options and not absolute  
76 concentration (Extended Data Fig. 1b), indicating that there was no saturation of taste sensation at the  
77 concentrations used. These results indicate that hungry flies tradeoff the appetitive (sweet) and aversive  
78 (bitter) values of food in making feeding decisions.

79 To further understand decision making behavior, we also recorded location of flies at the end of  
80 decision task, and as expected, position preference mirrored ingested food preference (Fig. 1c). Social  
81 interaction between animals can have effects on decision making. To keep the task similar to fly's natural  
82 social environment, we used random proportions of males and females per trial. There was no effect of  
83 male-to-female ratio on ingested food preference (Fig. 1d). Previous studies have shown that group size  
84 can affect *Drosophila* behavior<sup>4,5</sup>. At equal-preference condition (21h deprivation, 50 mM sucrose), food  
85 preference and group size (Fig. 1e), food preference and percent of flies that ate (Fig. 1f), and percent of  
86 flies that ate and group size (Fig. 1g) were not correlated. There was also no significant prediction of  
87 preference index by group size or percent of flies that ate in a multiple regression model (Fig. 1h,  
88 Extended Table 1), indicating no interaction between these variables in the decision task.

### 89 **A decision making neuronal ensemble converges on the fan-shaped body**

90 During foraging, animals compute value estimates of internal hunger state and external sensory  
91 environment such valence of available foods, location of food, etc. Various neuromodulators regulate  
92 hunger dependent food intake<sup>6-12</sup>, reward<sup>13-16</sup> or punishment<sup>17</sup>, as well as memory<sup>14,16,18</sup>. The mushroom  
93 body is an insect central brain region involved in gustatory learning and memory<sup>19,20</sup> and valence  
94 encoding<sup>21</sup>, and is thought to be a major center controlling higher-order behaviors<sup>22-24</sup>. The insect central  
95 complex is an evolutionarily conserved central brain region whose ellipsoid body and protocerebral  
96 bridge sub-regions have been implicated in navigation<sup>25-32</sup> and sleep<sup>33-35</sup>. The central complex fan-shaped  
97 body, a laminar neural sub-region, has been implicated in sleep<sup>36-39</sup> and ethanol preference<sup>40,41</sup>. The fan-  
98 shaped body was particularly interesting to us because several neuromodulators<sup>42</sup>, their receptors<sup>37,43,44</sup>, as  
99 well as dopaminergic inputs<sup>45,46</sup> co-localize in its layers. We hypothesized that value estimates of internal  
100 state and external environment from modulatory neurons will be required for integration by higher brain  
101 regions for decision making. To test this, we manipulated genetically targeted cell-specific neural  
102 expression using GAL4-UAS binary expression system<sup>47</sup>. We acutely optogenetically activated subsets of  
103 neurons using CsChrimson channelrhodopsin<sup>48</sup> while flies actively sampled and consumed food at the  
104 equal-preference condition (Fig. 1a, 1b, 21h food deprivation, 50 mM sucrose vs 500mM sucrose+1mM

105 quinine). It is not only activation of neurons but also inhibition that can modulate behavior. Therefore, for  
106 the next part of the screen, we optogenetically inhibited select genotypes from activation screen, using the  
107 anion-conducting channelrhodopsin GtACR1<sup>49</sup>. Genotypes were selected for inhibition screen based on  
108 the following pre-defined rules: a genotype with preference index lower than -0.3, or higher than 0.3, or a  
109 genotype with change in feeding during activation. This optogenetic interrogation of modulatory neurons  
110 and higher order brain regions revealed neuropeptidergic neurons (Leucokinin, Allatostatin A, NPF,  
111 DH44), subsets of dopaminergic neurons, and a narrow subset of fan-shaped body layer 6 neurons (FBL6)  
112 whose activation or inhibition significantly shifted food choice in the equal-preference condition (Fig.  
113 2a).

114 Activation of Leucokinin (Lk) neurons suppressed feeding in food deprived flies (Fig. 2a, 2b left  
115 panel, Extended Fig. 2a-b), suggesting that Lk may relay metabolic state information. To confirm that Lk  
116 secreted by these neurons was the molecular basis of this feeding suppression, we simultaneously  
117 knocked down Lk expression with genetically encoded RNAi while optogenetically activating Lk  
118 neurons. The majority of flies consumed food during simultaneous Lk RNAi and activation, while almost  
119 no flies consumed when Lk neurons were activated without Lk RNAi. This indicates that Lk secretion  
120 mediates feeding suppression by Lk neurons (Fig. 2b left panel, Extended Fig. 2a-b). Optogenetic  
121 silencing of Lk neurons shifted preference towards bittersweet (Fig. 2a, 2b left panel, Extended Fig. 2a-b).  
122 Feeding suppression on Lk neuron activation implies a decrease in perceived hunger level of food  
123 deprived flies, which is consistent with implied increased perceived hunger level on Lk neuron inhibition  
124 leading to increased preference for high sucrose bittersweet food. Activation of Allatostatin A (AstA)  
125 neurons shifted the preference towards sweet, while inhibition shifted the preference towards bittersweet  
126 (Fig. 2a, 2c left panel). We confirmed that AstA was the molecular basis of this shift in preference by  
127 simultaneous AstA RNAi knockdown and activation of AstA neurons (Fig. 2c left panel). Flies preferred  
128 sweet on activation of NPF neurons, and this shift was abolished by simultaneous activation and NPF  
129 RNAi knockdown (Fig. 2a, 2d left panel). Activation of DH44 neurons had no significant effect, but  
130 inhibition shifted the preference towards bittersweet food (Fig. 2a, 2e left). Dopaminergic subsets

131 involved in aversive memory (Fig. 2a PPL1  $\gamma 2\alpha'1$ )<sup>50</sup>, taste conditioning (Fig. 2a PPL1  $\alpha 3$ )<sup>18</sup>, and long-  
132 term memory (Fig. 2a PAM  $\alpha 1$ )<sup>14</sup> also affected food choice. Activation of these dopaminergic subsets  
133 shifted the preference toward bittersweet (Fig. 2a). Activation of neurons from different mushroom body  
134 lobes, a brain region controlling higher-order behaviors, had no effect on preference. However, inhibition  
135 of a specific subset of fan-shaped body neurons, FB16, shifted preference toward bittersweet (Fig. 2a, 3a  
136 left panel). Value estimates of internal state and external sensory environment, which are likely computed  
137 by modulatory neurons, are crucial for decision making. Fan-shaped body has co-localization of several  
138 neuromodulators and their receptors<sup>37,42-46</sup> and likely integrates the value estimates it receives from  
139 modulatory neurons.

140 To determine whether the neurons we identified in this optogenetic screen are connected in a  
141 behaviorally relevant ensemble, we employed a chemoconnectomics approach<sup>51</sup> exploring cell-specific  
142 genetically encoded RNAi knockdown of neuropeptide and dopamine receptors. Knockdown of  
143 neuropeptide or dopamine receptors in Lk neurons did not shift preference (Fig. 2b right panel), implying  
144 that Lk neurons receive food preference and hunger related information from other neurons.  
145 Dopaminergic Dop1R1 receptor RNAi in AstA neurons shifted preference towards sweet (Fig. 2c right  
146 panel), suggesting that AstA neurons receive food preference related dopaminergic inputs. Lkr and  
147 Dop1R1 receptor RNAi in NPF neurons shifted preference toward sweet (Fig. 2d right panel), suggesting  
148 that NPF neurons receive food preference relevant Lk and dopaminergic inputs. DopEcR receptor RNAi  
149 in DH44 neurons shifted preference toward bittersweet (Fig. 2e right panel), suggesting that DH44  
150 neurons receive food preference relevant dopaminergic inputs.

151 Importantly, RNAi knockdown of Lkr, AstA-R1, or DH44-R1 receptors in FB16 neurons shifted the  
152 preference toward bittersweet (Fig. 3a right panel), indicating that FB16 neurons are modulated by these  
153 three neuropeptides to affect food choice. Furthermore, change in food preference on receptor RNAi in  
154 FB16 mirrors change in food preference on respective neuropeptide neuron inhibition. For example, AstA-  
155 R1 receptor RNAi in FB16 neurons should inhibit AstA input to FB16, that is, have the effect that is  
156 equivalent of inhibiting AstA neurons. Consistently, both AstA-R1 receptor RNAi in FB16 neurons (Fig.

157 3a right panel), and AstA neuron inhibition (Fig. 2c left panel) shifted food preference towards  
158 bittersweet. Similarly, both DH44-R1 receptor RNAi in FB16 (Fig. 3a right panel) and DH44 neuron  
159 inhibition (Fig. 2d right panel) shifted preference towards bittersweet. Both Lkr receptor RNAi in FB16  
160 (Fig. 3a right panel), and Lk neuron inhibition (Fig. 2b right panel) also shifted preference towards  
161 bittersweet. RNAi of dopamine receptors in FB16 had no effect (Fig. 3a right panel). This matrixed  
162 strategy mapped the neuromodulatory connections between nodes in the ensemble to control choice, and  
163 uncovered a previously unknown convergence node (FB16) that is well positioned to integrate sensory,  
164 metabolic, and experiential information for decision making.

### 165 **Fan-shaped body neurons encode choice**

166 Value estimates of internal state like degree of hunger, and external environment like appetitive or  
167 aversive value of food (valence) and past experience, are integrated and transformed into choice. This  
168 raises the question of whether FB16 neurons compute value estimates or integrate these estimates to  
169 encode choice. If FB16 neurons estimated value of or encoded metabolic parameters such as hunger or  
170 satiety, manipulating their activity would be expected to influence feeding behavior. During FB16 neural  
171 manipulation, majority of food deprived flies consumed food while majority of fed flies did not (Fig. 3b,  
172 Extended Table 1), demonstrating that hunger state is not affected by FB16 neural activity. There was no  
173 significant difference in total amount of food consumed by flies during FB16 neural manipulation  
174 compared to control flies (Fig. 3c, Extended Table 1). There was also no significant difference in the  
175 amount of sweet versus bittersweet food consumed per fly during FB16 neural manipulation compared to  
176 controls (Fig. 3d, Extended Table 1). The shift in food preference during FB16 inhibition (Fig. 3a left  
177 panel) was due to larger number of flies preferring to consume bittersweet over sweet food rather than  
178 each fly consuming larger quantity bittersweet food. Taken together, these results demonstrate that FB16  
179 does not encode or affect metabolic signals of hunger or satiety.

180 Next, we asked if activity of FB16 neurons was inherently rewarding or aversive, that is, had inherent  
181 valence, which could shift food preference. To test this, we quantified place preference for illuminated  
182 versus dark parts of fly arena without food, during optogenetic manipulation of FB16 neurons. FB16

183 neural manipulation had no effect on preference for illuminated versus dark parts (Fig. 3e), demonstrating  
184 that FBI6 activation or inhibition is neither inherently rewarding nor aversive.

185 Animals accumulate past experience to inform future decisions. We hypothesized that FBI6 integrates  
186 hunger and food-related value estimates with experiential information for decision making. To understand  
187 how past experience affects FBI6 activity, we recorded FBI6 neural activity in flies that had different  
188 food-related experiences. Flies were presented taste stimuli from the equal-preference condition (Fig. 4a)  
189 while ratiometric  $Ca^{2+}$  activity in FBI6 was measured using GCaMP6f<sup>52</sup> and tdTomato (Fig. 4a, b). First,  
190 we tested the effect of hunger on FBI6 neural activity in naïve flies, i.e., flies that had not experienced the  
191 decision task at all. FBI6 neurons of naïve food-deprived flies were strongly inhibited by the bittersweet  
192 stimulus, but not sweet (Fig. 4d-e, naïve deprived). Flies often find bittersweet food aversive<sup>20</sup> and  
193 inhibition of naïve fly FBI6 neural activity in response to bittersweet stimulus may be a representation of  
194 rejected choice. Consistently, if FBI6 activity inhibition represents rejected food choice then neural  
195 activity in naïve fed flies should be strongly inhibited by both sweet and bittersweet stimuli because fed  
196 flies reject both foods in decision task (Fig. 3b). Indeed, FBI6 neurons of naïve fed flies showed strong  
197 inhibitory response to both bittersweet and sweet stimuli (Fig. 4d-e, naïve fed).

198 Next, we asked, if similar to naïve flies, FBI6 neural activity also represents behavioral choice in flies  
199 that experienced the decision task and made different food choices. FBI6 neurons of flies that chose sweet  
200 food were strongly inhibited by rejected bittersweet stimulus but not by chosen sweet (Fig. 4d-e, chose  
201 sweet). Correspondingly, FBI6 neurons of flies that chose bittersweet food were strongly inhibited by  
202 rejected sweet stimulus but not by chosen bittersweet (Fig. 4d-e, chose bittersweet). FBI6 neurons of flies  
203 that chose neither food, i.e. rejected both, were strongly inhibited by both bittersweet and sweet stimuli  
204 (Fig. 4d-e, chose neither). Overall, FBI6 neural activity is always strongly inhibited by food that a fly  
205 rejects, demonstrating that suppression of FBI6 activity is the neural representation of behavioral food  
206 choice. This neural representation is modulated by taste (sweet vs. bittersweet), previous experience  
207 (naïve vs. experience with two-choice conflict), as well as hunger state (naïve food deprived vs. fed) (Fig.  
208 4d-e). FBI6 neurons likely receive these different types of information directly through AstA, DH44, and



209 Lk receptor signaling, and indirectly through NPF and dopamine pathways of the decision ensemble, for  
210 integrating them to form a representation of choice before sending information to downstream motor  
211 circuits for decision implementation (Fig. 4f).

## 212 **Discussion**

213 Animals make decisions about which foods to consume by integrating their internal physiological  
214 state with external sensory cues. Here we delineated a neuronal ensemble in *Drosophila* that underlies  
215 food-related decision making during sensory conflict between sweet and bittersweet food choices (Fig.  
216 4f). Activating or silencing particular nodes in this ensemble shifts the decision balance between sweet  
217 and bittersweet food (Fig. 2b-e, 3a). This ensemble converges on to FBI6 and FBI6 neurons likely  
218 integrate information from the upstream modulatory network to transform it into the neural representation  
219 of food choice (Fig. 4f).

220 Organisms must assess and assign value estimates to their external environment and internal state  
221 before integrating these estimates for adaptive decision making. Neuromodulatory subsets in the decision  
222 ensemble that we have identified have roles in hunger dependent food intake behavior, reward, valence,  
223 and memory. These modulatory neurons are well positioned to estimate value of the sensory environment  
224 and internal hunger state. For example, AstA neuron activation shifts food preference from carbohydrates  
225 to protein<sup>6</sup>, while DH44 neurons sense sugars<sup>53</sup> and amino acids<sup>11</sup>. AstA and DH44 neurons may,  
226 therefore, convey food quality information to FBI6. NPF neuron activation is inherently rewarding<sup>54</sup> and  
227 may convey food valence information. Lk neurons have been implicated in nutrient sensing<sup>9</sup> and their  
228 activation suppresses feeding in food deprived flies (Fig. 2a-b), suggesting that internal metabolic state  
229 information may reach FBI6 through Lk/Lkr signaling. Dopaminergic subsets involved in aversive  
230 memory (PPL1  $\gamma 2\alpha'1$ )<sup>50</sup>, taste conditioning (PPL1  $\alpha 3$ )<sup>18</sup>, and memory (PAM  $\alpha 1$ )<sup>14</sup> also affected food  
231 choice (Fig. 2a) and may provide an error signal for predicting and updating value estimates similar to  
232 primate dopaminergic ventral tegmental area<sup>55</sup>. FBI6 neurons have axonal projections in the fan-shaped  
233 body<sup>45,46</sup>, dense dendritic projections in the superior medial protocerebrum (SMP), and sparse dendritic  
234 projections in superior intermediate protocerebrum (SIP) and superior lateral protocerebrum (SLP)<sup>45,46</sup>

235 (Fig. 4g). In these higher brain regions, FBl6 receives synaptic inputs from dopaminergic neurons<sup>38,39</sup> that  
236 regulate sleep<sup>38,39</sup> and ethanol preference<sup>41</sup>. Interestingly, direct dopaminergic input to FBl6 through  
237 dopamine receptors did not influence food choice (Fig. 3a). Instead indirect dopaminergic inputs  
238 conveyed by neuromodulatory neurons regulated food choice (Fig. 2b-e). Mammalian studies provide  
239 converging evidence on multiple interconnected networks in frontal cortex and basal ganglia that compute  
240 and store value estimates of sensory environment and motor events in that environment required for  
241 decision making<sup>55,56</sup>. The neural ensemble described in this study has a similar framework of  
242 interconnected networks that potentially store, compute, and update value estimates for decision making.

243 A value integrator for food-related decision making requires estimates of taste identity, previous  
244 experience, and hunger state. FBl6 neuron activity is modulated by these parameters but it is not yet clear  
245 how the information brought to FBl6 from upstream network is integrated and transformed into the  
246 representation of behavioral choice before it is sent to downstream motor neurons for decision  
247 implementation (Fig. 4f). Decision making theories in mammals have traditionally focused on how values  
248 are represented in the brain<sup>55,56</sup>, but how the brain integrates value information to make decisions when  
249 competing alternatives are present is still unclear<sup>57</sup>. Future investigations are required to identify and test  
250 proposed hypotheses of specific role of each node in the ensemble, how inputs from different nodes are  
251 integrated in FBl6, how this integration is transformed into the representation of choice, and which  
252 downstream motor circuits are involved in decision implementation.

## 253 **References**

- 254 1 Perugini, A., Ditterich, J. & Basso, M. A. Patients with Parkinson's Disease Show Impaired Use  
255 of Priors in Conditions of Sensory Uncertainty. *Curr Biol* **26**, 1902-1910,  
256 doi:10.1016/j.cub.2016.05.039 (2016).
- 257 2 Reiter, A. M., Heinze, H. J., Schlagenhauf, F. & Deserno, L. Impaired Flexible Reward-Based  
258 Decision-Making in Binge Eating Disorder: Evidence from Computational Modeling and  
259 Functional Neuroimaging. *Neuropsychopharmacology* **42**, 628-637, doi:10.1038/npp.2016.95  
260 (2017).
- 261 3 Scott, K. Gustatory Processing in *Drosophila melanogaster*. *Annu Rev Entomol* **63**, 15-30,  
262 doi:10.1146/annurev-ento-020117-043331 (2018).
- 263 4 Ramdya, P., Schneider, J. & Levine, J. D. The neurogenetics of group behavior in *Drosophila*  
264 *melanogaster*. *J Exp Biol* **220**, 35-41, doi:10.1242/jeb.141457 (2017).

- 265 5 Rooke, R., Rasool, A., Schneider, J. & Levine, J. D. *Drosophila melanogaster* behaviour changes  
266 in different social environments based on group size and density. *Commun Biol* **3**, 304,  
267 doi:10.1038/s42003-020-1024-z (2020).
- 268 6 Hentze, J. L., Carlsson, M. A., Kondo, S., Nassel, D. R. & Rewitz, K. F. The Neuropeptide  
269 Allatostatin A Regulates Metabolism and Feeding Decisions in *Drosophila*. *Sci Rep* **5**, 11680,  
270 doi:10.1038/srep11680 (2015).
- 271 7 Lin, S., Senapati, B. & Tsao, C. H. Neural basis of hunger-driven behaviour in *Drosophila*. *Open*  
272 *Biol* **9**, 180259, doi:10.1098/rsob.180259 (2019).
- 273 8 Nassel, D. R. & Zandawala, M. Recent advances in neuropeptide signaling in *Drosophila*, from  
274 genes to physiology and behavior. *Prog Neurobiol* **179**, 101607,  
275 doi:10.1016/j.pneurobio.2019.02.003 (2019).
- 276 9 Zandawala, M. *et al.* Modulation of *Drosophila* post-feeding physiology and behavior by the  
277 neuropeptide leucokinin. *PLoS Genet* **14**, e1007767, doi:10.1371/journal.pgen.1007767 (2018).
- 278 10 Cannell, E. *et al.* The corticotropin-releasing factor-like diuretic hormone 44 (DH44) and kinin  
279 neuropeptides modulate desiccation and starvation tolerance in *Drosophila melanogaster*.  
280 *Peptides* **80**, 96-107, doi:10.1016/j.peptides.2016.02.004 (2016).
- 281 11 Yang, Z. *et al.* A post-ingestive amino acid sensor promotes food consumption in *Drosophila*.  
282 *Cell Res* **28**, 1013-1025, doi:10.1038/s41422-018-0084-9 (2018).
- 283 12 Wu, Q. *et al.* Developmental control of foraging and social behavior by the *Drosophila*  
284 neuropeptide Y-like system. *Neuron* **39**, 147-161, doi:10.1016/s0896-6273(03)00396-9 (2003).
- 285 13 Liu, C. *et al.* A subset of dopamine neurons signals reward for odour memory in *Drosophila*.  
286 *Nature* **488**, 512-516, doi:10.1038/nature11304 (2012).
- 287 14 Yamagata, N. *et al.* Distinct dopamine neurons mediate reward signals for short- and long-term  
288 memories. *Proc Natl Acad Sci U S A* **112**, 578-583, doi:10.1073/pnas.1421930112 (2015).
- 289 15 Lyutova, R. *et al.* Reward signaling in a recurrent circuit of dopaminergic neurons and  
290 peptidergic Kenyon cells. *Nat Commun* **10**, 3097, doi:10.1038/s41467-019-11092-1 (2019).
- 291 16 Huetteroth, W. *et al.* Sweet taste and nutrient value subdivide rewarding dopaminergic neurons in  
292 *Drosophila*. *Curr Biol* **25**, 751-758, doi:10.1016/j.cub.2015.01.036 (2015).
- 293 17 Riemensperger, T., Voller, T., Stock, P., Buchner, E. & Fiala, A. Punishment prediction by  
294 dopaminergic neurons in *Drosophila*. *Curr Biol* **15**, 1953-1960, doi:10.1016/j.cub.2005.09.042  
295 (2005).
- 296 18 Masek, P., Worden, K., Aso, Y., Rubin, G. M. & Keene, A. C. A dopamine-modulated neural  
297 circuit regulating aversive taste memory in *Drosophila*. *Curr Biol* **25**, 1535-1541,  
298 doi:10.1016/j.cub.2015.04.027 (2015).
- 299 19 Kirkhart, C. & Scott, K. Gustatory learning and processing in the *Drosophila* mushroom bodies. *J*  
300 *Neurosci* **35**, 5950-5958, doi:10.1523/JNEUROSCI.3930-14.2015 (2015).
- 301 20 Masek, P. & Scott, K. Limited taste discrimination in *Drosophila*. *Proc Natl Acad Sci U S A* **107**,  
302 14833-14838, doi:10.1073/pnas.1009318107 (2010).
- 303 21 Aso, Y. *et al.* Mushroom body output neurons encode valence and guide memory-based action  
304 selection in *Drosophila*. *Elife* **3**, e04580, doi:10.7554/eLife.04580 (2014).
- 305 22 Lewis, L. P. *et al.* A Higher Brain Circuit for Immediate Integration of Conflicting Sensory  
306 Information in *Drosophila*. *Curr Biol* **25**, 2203-2214, doi:10.1016/j.cub.2015.07.015 (2015).
- 307 23 Cohn, R., Morantte, I. & Ruta, V. Coordinated and Compartmentalized Neuromodulation Shapes  
308 Sensory Processing in *Drosophila*. *Cell* **163**, 1742-1755, doi:10.1016/j.cell.2015.11.019 (2015).
- 309 24 Tsao, C. H., Chen, C. C., Lin, C. H., Yang, H. Y. & Lin, S. *Drosophila* mushroom bodies  
310 integrate hunger and satiety signals to control innate food-seeking behavior. *Elife* **7**,  
311 doi:10.7554/eLife.35264 (2018).
- 312 25 Giraldo, Y. M. *et al.* Sun Navigation Requires Compass Neurons in *Drosophila*. *Curr Biol* **28**,  
313 2845-2852 e2844, doi:10.1016/j.cub.2018.07.002 (2018).

- 314 26 Green, J., Vijayan, V., Mussells Pires, P., Adachi, A. & Maimon, G. A neural heading estimate is  
315 compared with an internal goal to guide oriented navigation. *Nat Neurosci* **22**, 1460-1468,  
316 doi:10.1038/s41593-019-0444-x (2019).
- 317 27 Honkanen, A., Adden, A., da Silva Freitas, J. & Heinze, S. The insect central complex and the  
318 neural basis of navigational strategies. *J Exp Biol* **222**, doi:10.1242/jeb.188854 (2019).
- 319 28 Kim, S. S., Rouault, H., Druckmann, S. & Jayaraman, V. Ring attractor dynamics in the  
320 Drosophila central brain. *Science* **356**, 849-853, doi:10.1126/science.aal4835 (2017).
- 321 29 Mathejczyk, T. F. & Wernet, M. F. Heading choices of flying Drosophila under changing angles  
322 of polarized light. *Sci Rep* **9**, 16773, doi:10.1038/s41598-019-53330-y (2019).
- 323 30 Seelig, J. D. & Jayaraman, V. Neural dynamics for landmark orientation and angular path  
324 integration. *Nature* **521**, 186-191, doi:10.1038/nature14446 (2015).
- 325 31 Sun, Y. *et al.* Neural signatures of dynamic stimulus selection in Drosophila. *Nat Neurosci* **20**,  
326 1104-1113, doi:10.1038/nn.4581 (2017).
- 327 32 Turner-Evans, D. *et al.* Angular velocity integration in a fly heading circuit. *Elife* **6**,  
328 doi:10.7554/eLife.23496 (2017).
- 329 33 Liu, S., Liu, Q., Tabuchi, M. & Wu, M. N. Sleep Drive Is Encoded by Neural Plastic Changes in  
330 a Dedicated Circuit. *Cell* **165**, 1347-1360, doi:10.1016/j.cell.2016.04.013 (2016).
- 331 34 Liu, C. *et al.* A Serotonin-Modulated Circuit Controls Sleep Architecture to Regulate Cognitive  
332 Function Independent of Total Sleep in Drosophila. *Curr Biol* **29**, 3635-3646 e3635,  
333 doi:10.1016/j.cub.2019.08.079 (2019).
- 334 35 Guo, F., Holla, M., Diaz, M. M. & Rosbash, M. A Circadian Output Circuit Controls Sleep-Wake  
335 Arousal in Drosophila. *Neuron* **100**, 624-635 e624, doi:10.1016/j.neuron.2018.09.002 (2018).
- 336 36 Donlea, J. M., Pimentel, D. & Miesenbock, G. Neuronal machinery of sleep homeostasis in  
337 Drosophila. *Neuron* **81**, 860-872, doi:10.1016/j.neuron.2013.12.013 (2014).
- 338 37 Donlea, J. M. *et al.* Recurrent Circuitry for Balancing Sleep Need and Sleep. *Neuron* **97**, 378-389  
339 e374, doi:10.1016/j.neuron.2017.12.016 (2018).
- 340 38 Liu, Q., Liu, S., Kodama, L., Driscoll, M. R. & Wu, M. N. Two dopaminergic neurons signal to  
341 the dorsal fan-shaped body to promote wakefulness in Drosophila. *Curr Biol* **22**, 2114-2123,  
342 doi:10.1016/j.cub.2012.09.008 (2012).
- 343 39 Pimentel, D. *et al.* Operation of a homeostatic sleep switch. *Nature* **536**, 333-337,  
344 doi:10.1038/nature19055 (2016).
- 345 40 Scaplen, K. M. *et al.* Circuits that encode and guide alcohol-associated preference. *Elife* **9**,  
346 doi:10.7554/eLife.48730 (2020).
- 347 41 Azanchi, R., Kaun, K. R. & Heberlein, U. Competing dopamine neurons drive oviposition choice  
348 for ethanol in Drosophila. *Proc Natl Acad Sci U S A* **110**, 21153-21158,  
349 doi:10.1073/pnas.1320208110 (2013).
- 350 42 Kahsai, L. & Winther, A. M. Chemical neuroanatomy of the Drosophila central complex:  
351 distribution of multiple neuropeptides in relation to neurotransmitters. *J Comp Neurol* **519**, 290-  
352 315, doi:10.1002/cne.22520 (2011).
- 353 43 Al-Anzi, B. *et al.* The leucokinin pathway and its neurons regulate meal size in Drosophila. *Curr*  
354 *Biol* **20**, 969-978, doi:10.1016/j.cub.2010.04.039 (2010).
- 355 44 Cavey, M., Collins, B., Bertet, C. & Blau, J. Circadian rhythms in neuronal activity propagate  
356 through output circuits. *Nat Neurosci* **19**, 587-595, doi:10.1038/nn.4263 (2016).
- 357 45 Kim, J. H. *et al.* The voltage-gated potassium channel Shaker promotes sleep via thermosensitive  
358 GABA transmission. *Commun Biol* **3**, 174, doi:10.1038/s42003-020-0902-8 (2020).
- 359 46 Qian, Y. *et al.* Sleep homeostasis regulated by 5HT2b receptor in a small subset of neurons in the  
360 dorsal fan-shaped body of drosophila. *Elife* **6**, doi:10.7554/eLife.26519 (2017).
- 361 47 Brand, A. H. & Perrimon, N. Targeted gene expression as a means of altering cell fates and  
362 generating dominant phenotypes. *Development* **118**, 401-415 (1993).
- 363 48 Klapoetke, N. C. *et al.* Independent optical excitation of distinct neural populations. *Nat Methods*  
364 **11**, 338-346, doi:10.1038/nmeth.2836 (2014).

- 365 49 Mohammad, F. *et al.* Optogenetic inhibition of behavior with anion channelrhodopsins. *Nat*  
366 *Methods* **14**, 271-274, doi:10.1038/nmeth.4148 (2017).
- 367 50 Berry, J. A., Cervantes-Sandoval, I., Nicholas, E. P. & Davis, R. L. Dopamine is required for  
368 learning and forgetting in *Drosophila*. *Neuron* **74**, 530-542, doi:10.1016/j.neuron.2012.04.007  
369 (2012).
- 370 51 Deng, B. *et al.* Chemoconnectomics: Mapping Chemical Transmission in *Drosophila*. *Neuron*  
371 **101**, 876-893 e874, doi:10.1016/j.neuron.2019.01.045 (2019).
- 372 52 Chen, T. W. *et al.* Ultrasensitive fluorescent proteins for imaging neuronal activity. *Nature* **499**,  
373 295-300, doi:10.1038/nature12354 (2013).
- 374 53 Dus, M. *et al.* Nutrient Sensor in the Brain Directs the Action of the Brain-Gut Axis in  
375 *Drosophila*. *Neuron* **87**, 139-151, doi:10.1016/j.neuron.2015.05.032 (2015).
- 376 54 Shao, L. *et al.* Dissection of the *Drosophila* neuropeptide F circuit using a high-throughput two-  
377 choice assay. *Proc Natl Acad Sci U S A* **114**, E8091-E8099, doi:10.1073/pnas.1710552114  
378 (2017).
- 379 55 Sugrue, L. P., Corrado, G. S. & Newsome, W. T. Choosing the greater of two goods: neural  
380 currencies for valuation and decision making. *Nat Rev Neurosci* **6**, 363-375, doi:10.1038/nrn1666  
381 (2005).
- 382 56 Lee, D., Seo, H. & Jung, M. W. Neural basis of reinforcement learning and decision making.  
383 *Annu Rev Neurosci* **35**, 287-308, doi:10.1146/annurev-neuro-062111-150512 (2012).
- 384 57 Tsetsos, K., Chater, N. & Usher, M. Saliency driven value integration explains decision biases  
385 and preference reversal. *Proc Natl Acad Sci U S A* **109**, 9659-9664,  
386 doi:10.1073/pnas.1119569109 (2012).
- 387 58 Jenett, A. *et al.* A GAL4-driver line resource for *Drosophila* neurobiology. *Cell Rep* **2**, 991-1001,  
388 doi:10.1016/j.celrep.2012.09.011 (2012).
- 389 59 FlyLight, J.

390

### 391 **Author contributions**

392 P.S. conceptualized the study, designed and performed experiments, and analyzed data; L.Y.M.  
393 contributed to experimental design and fly dissection; P.S. and M.N.N. interpreted data; P.S. and  
394 M.N.N. prepared the manuscript with inputs from all authors.

395

### 396 **Acknowledgements**

397 We would like to thank Peter Niesman for help with calcium imaging data collection and Jason  
398 Braco for helpful discussions. Yichen Luo from John Carlson's lab provided useful information  
399 about taste delivery imaging rig. Tanya Wolff generously provided insights into fan-shaped body  
400 neuroanatomy. We would also like to thank Gerry Rubin and Tanya Wolff for sharing  
401 unpublished fly lines ss00208 and ss00225. These studies were supported in part by the National

402 Institute of Neurological Disorder and Stroke, National Institutes of Health (NIH)  
403 (RO1NS091070) and the National Institute of General Medical Sciences, NIH (RO1GM098932).

404

## 405 **Methods**

### 406 *Fly husbandry*

407 Flies were cultured on standard cornmeal medium on 12:12 light:dark cycle at 25°C. w1118 lab  
408 stock was used as wild type. ss00208 and ss00225 unpublished split-GAL4 lines were a generous  
409 gift from Gerry Rubin. All genotypes and their sources are described in Extended Table 2. 2-5  
410 day old flies were wet starved for 2-48 h (based on experiment design) on a wet Kimwipe with  
411 1.5 ml distilled water. For optogenetic experiments, flies were food deprived for 21 h before  
412 testing on 0.4 mM all-*trans* Retinal (Cayman Chemicals) in 1% agar. Flies for RNAi knockdown  
413 and their controls were moved to 28°C for 21 h the day before testing, i.e., during food  
414 deprivation, to induce strong RNAi. RNAi control was created for each GAL4 line by crossing  
415 the respective GAL4 to UAS-Valium (see Extended Table 2). All RNAi lines that we used were  
416 from Harvard TRiP project<sup>1,2</sup> and have been validated by independent groups (see Extended  
417 Table 2). Flies for simultaneous optogenetic and RNAi experiments were created using the  
418 genotypes mentioned in Extended Table 2. All experiments were conducted at Zeitgeber Time 3-  
419 6.

420

### 421 *Two-choice assay and optogenetics*

422 Sweet foods were made with different concentrations of sucrose and bittersweet foods with  
423 500mM sucrose (Sigma) and 1mM quinine (Alfa Aesar or Beantown Chemicals, CAS#207671-  
424 44-1) dissolved in 1% agarose (AmericanBio) made in distilled water. 0.04% w/v red dye



425 (Sulforhodamine B, MP Biochemicals, CAS# 3520-42-1) and 0.02% w/v blue dye (Erioglaucine  
426 A, Alfa Aesar, CAS# 3844-45-9) were used for food coloring. Dye colors were alternated  
427 between sweet and bittersweet foods for each condition and there was no preference for one dye  
428 over the other at the concentrations used. Fly arenas were prepared by pouring agarose based  
429 foods in two-compartment petri-dishes (90-100 mm diameter) from Kord Valmark, EMS, or  
430 Fisher Scientific. Because of a thin physical barrier between the two compartments in the arena  
431 there was no diffusion between the two foods. Groups of 20-35 flies were aspirated and  
432 introduced into the arena 5-10 sec before the start of the experiment. All experiments were  
433 conducted in dark so that there was no effect of food color on preference. Arenas were placed on  
434 a platform with IR backlight for video recording using a Flea Pointgrey camera (FL3-U3-  
435 20E4C/M) at 15 fps. For optogenetics, we used high-power LEDs (Luxeon) placed adjacent to  
436 backlight IR LEDs (based on Janelia ID&F design) of 627 nm (for CsChrimson) and 520 nm (for  
437 GtACR1) that were controlled using Arduino Uno. For optogenetic screen, both red and green  
438 lights were pulsed at 100% max intensity, 50Hz, 25% duty cycle. For follow up experiments,  
439 CsChrimson experiments were conducted at 25% max intensity; GtACR1 follow up was done at  
440 screen condition. Light was pulsed for the entire duration of the experiment. At the end of the  
441 experiment, flies were anaesthetized using CO<sub>2</sub> and their belly color was recorded under a  
442 dissection microscope. Preference index (PI) was calculated as (no. of sweet food flies + 0.5 no.  
443 of both food flies) - (no. of bittersweet food flies + 0.5 no. of both food flies) / no. of total flies  
444 that ate, where negative PI would mean that more number of flies ate bittersweet food.

445

446 *Food intake quantification*

447 Food intake was quantified using spectrophotometry as previously described<sup>3,4</sup>. After recording  
448 belly color flies were frozen in 1.5 ml Eppendorf tubes at -20°C until intake quantification (1-2  
449 days). Flies from each trial were separately homogenized in distilled water (5 µl /fly) using a  
450 motorized pestle (BT LabSystems, BT703) for 1.5 min and centrifuged at 13000 rpm for 5 min.  
451 Absorbance of the debris-cleared 2 µl supernatant was measured on NanoDrop 2000  
452 Spectrophotometer (Thermo Fisher Scientific) at 565 nm (for red dye) and 630nm (for blue dye).  
453 Flies that ate uncolored 1% agarose with 50mM sucrose were used as blank for baseline control.  
454 Red and blue dye concentrations were interpolated using their respective standard curves  
455 (GraphPad Prism) acquired from serial dilutions of single dyes in distilled water. Since we knew  
456 the number of flies that ate each color per trial, we could calculate per fly blue and red  
457 concentrations in the same solution.

458

#### 459 *Calcium imaging and data analysis*

460 3-5 day old flies (naïve or after two-choice assay) were aspirated and positioned in a custom  
461 made fly holder in which they were glued using two-part transparent epoxy (Devcon). Only the  
462 top of fly head (for imaging) and the forelegs (for taste delivery) were outside the holder, while  
463 the rest of the fly, including proboscis were restrained in the fly holder. No anesthesia was used.  
464 A small piece of head cuticle was dissected and air sacs removed using a 30-gauge syringe  
465 needle and fine forceps, immediately followed by sealing the head capsule with a translucent  
466 surgical silicone adhesive (Kwil-Sil, WPI). Dissected fly was then placed in a humidified  
467 chamber for 15 min recovery before imaging.

468 Calcium imaging was performed on a Zeiss Axio Examiner upright microscope with 20x  
469 air objective and a Colibri module for LED control. tdTomato was excited at 555 nm (80%



470 intensity) and GCaMP6 at 470 nm (100% intensity). An image splitter (Photometrics DV-2) was  
471 used to split red and green channels and acquire simultaneous images for tdTomato and  
472 GCaMP6 using a Hamamatsu ORCA-R2 C10600 camera. Images were acquired at 5 fps with  
473 variable baseline (3 to 10 s required for stable tastant delivery) followed by tastant application to  
474 the forelegs, using a syringe, for 3 s and 4 s of no tastant. Excess tastant was wicked from the  
475 forelegs using absorbent tissue paper between each application. 10 s inter-trial interval was used  
476 during which all lights were off. Water was always applied first, followed by either sweet or  
477 bittersweet tastant. Sequence of sweet and bittersweet was alternated between flies. Sweet: 50  
478 mM sucrose in distilled water; bittersweet: 500 mM sucrose + 1 mM quinine in distilled water.  
479 For flies that chose sweet in the two-choice behavior assay only trials with sweet as the first  
480 tastant were averaged and for flies that chose bittersweet, only trials with bittersweet as the first  
481 tastant were averaged.

482 Pixel intensities were extracted in Fiji followed by data analysis in MATLAB, both using  
483 custom written code. After background subtraction using Fiji's rolling-ball method (20 px), ROIs  
484 were manually drawn and saved on the tdTomato image, and superimposed on the GCaMP  
485 image (both reporters were expressed in the same neurons using the same driver) for mean ROI  
486 pixel intensity extraction. The saved intensity signals were then analyzed in MATLAB.  
487 tdTomato and GCaMP traces were individually corrected for photobleaching by fitting a single  
488 exponential function. Corrected GCaMP trace was then divided by the corrected tdTomato trace  
489 to obtain the ratiometric fluorescence trace ( $R$ ). For relative fluorescence fold change ( $\Delta R/R_0$ )  
490 determination, baseline fluorescence ( $R_0$ ) was calculated by averaging  $R$  over 2 s preceding  
491 tastant application. Peak  $\Delta R/R_0$  was calculated during 4 s following tastant application.  
492

493 *EM reconstruction*

494 Electron microscopy images were reconstructed from publically available Janelia FlyEM  
495 hemibrain data using neuPRINT<sup>5</sup>. Neuron identities were confirmed in NeuronBridge<sup>6</sup> by cross-  
496 referencing EM traced FBI6 neurons matched with light microscopy images of 84C10-GAL4  
497 from FlyLight<sup>7</sup>. FBI6 mesh, whole FB mesh, and SMP, SIP and SLP brain region meshes were  
498 used to depict brain regions with neural projection areas.

499

500 *Statistics*

501 All data were plotted in either Python or MATLAB using custom written code. Statistics were  
502 carried out in GraphPad Prism. If all data passed Kolmogorov-Smirnov normality test, ANOVA  
503 was conducted, otherwise Kruskal-Wallis test was conducted, both followed by appropriate post-  
504 hoc tests. Details of statistics for each figure are provided in Extended Table 1. Sample sizes are  
505 reported in parentheses next to dataset name in Extended Table 1.

506

507 **Figure legends**

508 **Fig. 1. Hungry flies make trade-offs between the appetitive and aversive value of food. a,**

509 Schematic of the two-choice decision making assay. Sweet and bittersweet foods are prepared in  
510 agarose, mixed with food dyes (e.g. sweet blue and bittersweet red) and solidified in a circular  
511 arena. Dye colors are counterbalanced within each condition. Flies are introduced into the food  
512 arena in dark to walk, sample and consume freely for 5 min, while they are video recorded with  
513 infrared (IR) backlight. At the end of the assay, flies are anaesthetized and their belly color is  
514 recorded under a dissecting microscope indicating ingested food. Preference index is calculated  
515 as (no. of sweet color flies+0.5 purple flies) - (no. of bittersweet color flies+0.5 purple flies)/total

516 no. of flies that ate. **b**, Preference index dose-response curves of wild-type (w1118) flies that  
517 underwent food deprivation for increasing durations show that flies make trade-offs between the  
518 sweet and bitter values of food and have equal-preference for both at a 10 fold sucrose  
519 concentration ratio (50 mM sucrose-only) between the sweet and bittersweet option. This equal-  
520 preference is dependent on concentration ratio between the two options (Extended Fig. 1b). For  
521 all further experiments, 21h food deprivation was used, which is highlighted in orange. **c**,  
522 Position preference index, i.e., sweet or bittersweet patch preference based on the location of the  
523 flies at the end of the assay matches ingested food preference, with equal-preference at 50 mM  
524 sucrose-only. **d**, Preferences of male and females within a group were indistinguishable at all the  
525 conditions tested. Preference index and group size per trial (**e**), preference index and % of flies  
526 that ate per trial (**f**), as well as % of flies that ate per trial and group size (**g**) were not correlated.  
527 **h**, Group size and % flies that ate did not significantly predict preference index in a multiple  
528 regression model, indicating no interaction between these variables. **b-d**, Plots show mean $\pm$ 95%  
529 CI, and violins depict full data distribution. Each violin has  $10 \leq \text{trials} \leq 30$  with mode=10. **e-h**,  
530 Heatmaps depict bivariate distribution visualized using a kernel density estimation procedure;  
531 darkest regions have higher data density.  $r^2$  is the square of Pearson's coefficient. See Extended  
532 Table 1 for sample size and statistics.

533

534 **Fig. 2. A decision making neuronal ensemble is revealed by combined optogenetics and**  
535 **RNAi knockdown. a**, Cell-specific optogenetic activation and inhibition screen was performed  
536 at 21 h food deprivation and equal-preference condition (50 mM sucrose vs 500 mM sucrose+1  
537 mM quinine). Neuronal subsets were genetically targeted using the GAL4-UAS binary  
538 expression system. CsChrimson (Chr) was used for activation and GtACR1 (Gt) for silencing.

539 Several neuropeptides, dopaminergic subsets, and a distinct subset of FB layer 6 neurons (FBl6)  
540 affected decision making based on significant difference in preference index compared to  
541 respective empty>Chr or empty>Gt controls. **b** (left), Leucokinin (Lk) neuron activation  
542 suppresses feeding in food deprived flies, while inhibition shifts the preference to bittersweet  
543 food. Simultaneous Lk RNAi and activation in Lk neurons abolishes activation effect. **b** (right),  
544 RNAi in Lk neurons of analogous receptors of other candidate neuromodulators has no effect. Lk  
545 manipulation effect is summarized in the adjacent schematic. **c** (left), Allatostatin A (AstA)  
546 neuron activation shifts preference to sweet while inhibition shifts it to bittersweet. Simultaneous  
547 AstA RNAi and activation abolishes activation effect. **c** (right), Dop1R1 RNAi in AstA neurons  
548 also shifts preference to sweet. **d** (left), NPF neuron activation shifts preference to sweet. This  
549 shift is abolished on simultaneous NPF RNAi and activation. **d** (right), Lkr and Dop1R1 RNAi in  
550 NPF neurons shifts preference to sweet. **e** (left), DH44 neuron activation has no effect while  
551 inhibition shifts preference to bittersweet. **e** (right), DopEcR RNAi in DH44 neurons shifts  
552 preference to bittersweet. Neuropeptide manipulation effects for each panel are summarized in  
553 adjacent schematics. Plots show mean $\pm$ 95% CI, with violins depicting full data distribution;  
554  $5 \leq \text{trials} \leq 30$  per violin, mode=10. Statistically different means are shown in different color. See  
555 Extended Table 1 for sample size and statistics.  $p < 0.00001 = ****$ ,  $p < 0.0001 = ***$ ,  $p < 0.01 = **$ ,  
556  $p < 0.05 = *$ .

557

558 **Fig. 3. Fan-shaped Body layer 6 is the convergence node of a decision making ensemble. a**  
559 (left), FBl6 neuron activation has no effect on preference however, inhibition shifts preference to  
560 bittersweet. **a** (right), Receptor RNAi knockdown of AstA-R1, DH44-R1, and Lkr in FBl6 also  
561 shifts preference to bittersweet. **b**, FBl6 activation or inhibition does not affect feeding initiation

562 in fed or food-deprived flies. **c-d**, Total consumption/fly is not different on FBI6 activation (**c**) or  
563 inhibition (**d**) compared to empty controls. Sweet and bittersweet consumption/fly is not  
564 different within the same group on FBI6 activation (**c**) or inhibition (**d**). **e**, There is no significant  
565 difference in place preference between FBI6 and empty control in an arena with illuminated and  
566 non-illuminated parts without food, indicating that neither activation nor inhibition of FBI6 is  
567 inherently rewarding or aversive. Plots show mean $\pm$ 95% CI, with violins depicting full data  
568 distribution. Statistically different means are shown in different color. See Extended Table 1 for  
569 sample size and statistics.  $p < 0.00001 = ****$ ,  $p < 0.0001 = ***$ ,  $p < 0.01 = **$ ,  $p < 0.05 = *$ .

570

571 **Fig. 4. Neural activity in FBI6 encodes food choice.** **a**, Schematic of live animal calcium  
572 imaging during taste application of flies with different hunger state and experiences. Tastants  
573 from decision assay are applied to fly forelegs and changes in calcium responses are measured in  
574 the FBI6 using GCaMP6f. **b**, Neuronal expression of FBI6 reported by tdTomato for ratiometric  
575 imaging. Region of interest for fluorescence measurement is outlined in cyan. 84C10-GAL4 used  
576 to target FBI6 strongly and specifically targets FBI6 neurons<sup>57,58</sup>, and shifts the preference to  
577 bittersweet on optogenetic inhibition (Extended Fig. 3b-d). **c**, EM reconstruction of example  
578 FBI6 neurons targeted by 84C10-GAL4 in the hemibrain with surface mesh for FBI6 shows  
579 projections restricted to FBI6. **d**, Ratiometric calcium responses,  $\Delta R/R_0$ , of flies with different  
580 hunger state and past experience. Sweet (50mM sucrose) and bittersweet (500 mM sucrose+1  
581 mM quinine) tastants from equal-preference condition were applied for 3 s and neural response  
582 was quantified for 4 s post-stimulus application. Tastant application is indicated by gray  
583 background region. FBI6 neurons respond with strong inhibitory responses when behaviorally  
584 rejected tastant is presented (**d-e**). Calcium activity trace depicts mean  $\Delta R/R_0 \pm 95\%$  CI. **e**, Peak

585  $\Delta R/R_0$  shows significant difference between response to rejected versus chosen tastant within  
 586 each fly condition.  $p < 0.05 = *$  (see Extended Table 1 for details on statistics). Points on graphs  
 587 represent mean  $\pm 95\%$  CI, with violins depicting full data distribution. **f**, EM reconstruction of  
 588 example FB16 neurons targeted by 84C10-GAL4, with surface mesh for whole FB showing  
 589 surface meshes for higher brain regions to which FB16 neurons project. **g**, Schematic of the  
 590 decision making ensemble converging on to FB16. FB16 activity is the neural representation of  
 591 behavioral food choice. This activity is modulated by taste, previous experience, and hunger  
 592 state. FB16 neurons likely receive these different types of information directly through AstA,  
 593 DH44, and Lk receptor signaling, and indirectly through NPF and dopamine (DA) pathways.  
 594 FB16 integrates the converging information to form a representation of choice, which is relayed  
 595 to downstream motor circuits for behavior implementation.

596 **Extended Table 1**

| <b>Figure</b> | <b>Datasets compared</b>                              | <b>Statistics</b>                                                           |
|---------------|-------------------------------------------------------|-----------------------------------------------------------------------------|
| Fig. 1d       | w <sup>1118</sup> male vs. female Preference index    | Mixed-effects analysis,<br>F(9,118)=22.46,<br>p<0.0001                      |
|               |                                                       | Sidak's adjusted p:                                                         |
|               | 1mM male vs. female (n=10)                            | 0.9968                                                                      |
|               | 10mM male vs. female (n=10)                           | >0.9999                                                                     |
|               | 50mM male vs. female (n=20)                           | 0.1784                                                                      |
|               | 100mM male vs. female (n=27)                          | 0.5552                                                                      |
|               | 500mM male vs. female (n=10)                          | 0.8233                                                                      |
| Fig. 1e       | w <sup>1118</sup> Preference index, Group size (n=77) | Pearson's $r^2=0.05655$ ,<br>p=0.0373                                       |
| Fig. 1f       | w <sup>1118</sup> Preference index, % ate (n=77)      | Pearson's $r^2=0.225$ ,<br>p<0.0001                                         |
| Fig. 1g       | w <sup>1118</sup> % ate, Group size (n=77)            | Pearson's $r^2=0.0006$ ,<br>p=0.8313                                        |
| Fig. 1h       | w <sup>1118</sup> Preference index, Group size, % ate | Multiple linear<br>regression,<br>F(3,73)=9.393,<br>p<0.0001<br>$r^2=0.278$ |

| Fig. 2a | Optogenetic Screen 20XUAS-Chrimson (Chr)<br>empty>Chr (n=30)        | One-way ANOVA,<br>F(40,358)=5.397,<br>p<0.0001<br>Dunnett's adjusted p: |
|---------|---------------------------------------------------------------------|-------------------------------------------------------------------------|
|         | empty>Chr vs. Akh>Chr (n=10)                                        | 0.9996                                                                  |
|         | <b>empty&gt;Chr vs. AstA&gt;Chr (n=10)</b>                          | <b>&lt;0.0001</b>                                                       |
|         | empty>Chr vs. Crz>Chr (n=10)                                        | 0.9990                                                                  |
|         | empty>Chr vs. DH44>Chr (n=10)                                       | 0.1302                                                                  |
|         | empty>Chr vs. Lk>Chr (n=10)                                         | 0.9997                                                                  |
|         | <b>empty&gt;Chr vs. NPF&gt;Chr (n=10)</b>                           | <b>&lt;0.0001</b>                                                       |
|         | empty>Chr vs. Proctolin>Chr (n=10)                                  | 0.9997                                                                  |
|         | empty>Chr vs. sNPF>Chr (n=10)                                       | 0.9983                                                                  |
|         | empty>Chr vs. Tk>Chr (n=10)                                         | 0.9993                                                                  |
|         | empty>Chr vs. TH>Chr (n=10)                                         | 0.9983                                                                  |
|         | empty>Chr vs. PPL1 (504B)>Chr (n=10)                                | 0.9998                                                                  |
|         | empty>Chr vs. PPL1 (65B)>Chr (n=10)                                 | 0.9996                                                                  |
|         | empty>Chr vs. PAM (58E02)>Chr (n=10)                                | 0.9993                                                                  |
|         | empty>Chr vs. OA/TA Tdc>Chr (n=10)                                  | >0.9999                                                                 |
|         | empty>Chr vs. Ser/Trh>Chr (n=10)                                    | 0.9997                                                                  |
|         | <b>empty&gt;Chr vs. <math>\gamma 2\alpha'1</math>&gt;Chr (n=10)</b> | <b>&lt;0.0001</b>                                                       |
|         | empty>Chr vs. $\alpha 3$ >Chr (n=10)                                | 0.8644                                                                  |
|         | empty>Chr vs. $\gamma 1$ -pedc>Chr (n=10)                           | 0.9986                                                                  |
|         | empty>Chr vs. $\alpha'2\alpha 2$ >Chr (n=10)                        | 0.9997                                                                  |
|         | empty>Chr vs. $\alpha'2\alpha 2, \gamma 2\alpha'1$ >Chr (n=10)      | 0.9995                                                                  |
|         | <b>empty&gt;Chr vs. <math>\alpha 1</math>&gt;Chr (n=10)</b>         | <b>0.0070</b>                                                           |
|         | empty>Chr vs. $\beta 1$ >Chr (n=10)                                 | 0.1241                                                                  |
|         | empty>Chr vs. $\beta 1\beta 2$ >Chr (n=10)                          | 0.9924                                                                  |
|         | empty>Chr vs. $\gamma 5$ >Chr (n=10)                                | 0.9997                                                                  |
|         | empty>Chr vs. $\beta'2a$ >Chr (n=6)                                 | 0.9983                                                                  |
|         | empty>Chr vs. $\gamma 4, \gamma 4 < \gamma 1 \gamma 2$ >Chr (n=10)  | 0.9982                                                                  |
|         | empty>Chr vs. $\gamma 3$ >Chr (n=10)                                | 0.9990                                                                  |
|         | empty>Chr vs. allKC 10B>Chr (n=10)                                  | 0.9988                                                                  |
|         | empty>Chr vs. $\alpha/\beta$ 8B>Chr (n=8)                           | 0.9988                                                                  |
|         | empty>Chr vs. $\alpha/\beta$ c739>Chr (n=10)                        | 0.9988                                                                  |
|         | empty>Chr vs. $\alpha'/\beta'$ 5B>Chr (n=10)                        | 0.9997                                                                  |
|         | empty>Chr vs. $\gamma$ -m 131B>Chr (n=8)                            | 0.3762                                                                  |
|         | empty>Chr vs. FBI4,6 ss20>Chr (n=15)                                | 0.9997                                                                  |
|         | empty>Chr vs. FBI3,4,6 ss208>Chr (n=10)                             | 0.9990                                                                  |
|         | empty>Chr vs. FBI3,4,6 ss225>Chr (n=10)                             | 0.9993                                                                  |
|         | empty>Chr vs. FBI6 c205>Chr (n=10)                                  | 0.9777                                                                  |
|         | empty>Chr vs. FBI2,8,9 R89E07>Chr (n=10)                            | 0.6555                                                                  |
|         | empty>Chr vs. FBI5,8,9 R38E07>Chr (n=10)                            | 0.9994                                                                  |
|         | empty>Chr vs. ventral FB R58F03>Chr (n=10)                          | 0.3548                                                                  |
|         | empty>Chr vs. FB11,2 R52G12>Chr (n=10)                              | 0.9987                                                                  |

|         |                                                                                                                                                                                                                                                                                                                                                                                                                                                |                                                                                                                                          |
|---------|------------------------------------------------------------------------------------------------------------------------------------------------------------------------------------------------------------------------------------------------------------------------------------------------------------------------------------------------------------------------------------------------------------------------------------------------|------------------------------------------------------------------------------------------------------------------------------------------|
| Fig. 2a | Optogenetic Screen 20XUAS-GtACR1 (Gt)<br>empty>Gt (n=30)                                                                                                                                                                                                                                                                                                                                                                                       | One-way ANOVA,<br>F(10,129)=7.719,<br>p<0.0001                                                                                           |
|         |                                                                                                                                                                                                                                                                                                                                                                                                                                                | Dunnett's adjusted p:                                                                                                                    |
|         | <b>empty&gt;Gt vs. AstA&gt;Gt</b> (n=10)<br><b>empty&gt;Gt vs. DH44&gt;Gt</b> (n=10)<br><b>empty&gt;Gt vs. Lk&gt;Gt</b> (n=10)<br>empty>Gt vs. NPF>Gt (n=10)<br>empty>Gt vs. $\gamma 2\alpha' 1$ >Gt (n=10)<br><b>empty&gt;Gt vs. <math>\alpha 3</math>&gt;Gt1</b> (n=10)<br>empty>Gt vs. $\alpha 1$ >Gt (n=10)<br>empty>Gt vs. $\beta 1$ >Gt (n=10)<br><b>empty&gt;Gt vs. FBI6 c205&gt;Gt</b> (n=10)<br>empty>Gt vs. FBI2,8,9 89E07>Gt (n=20) | <b>0.0004</b><br><b>0.0023</b><br><b>0.0081</b><br>0.4307<br>>0.9999<br><b>&lt;0.0001</b><br>0.9628<br>0.9996<br><b>0.0002</b><br>0.2042 |
| Fig. 2b | Lk (left panel)                                                                                                                                                                                                                                                                                                                                                                                                                                | One-way ANOVA,<br>F(4,84)=8.136,<br>p<0.0001                                                                                             |
|         |                                                                                                                                                                                                                                                                                                                                                                                                                                                | Sidak's adjusted p:                                                                                                                      |
|         | empty>Chr (n=10) (n=10) vs. Lk>Chr (n=20)<br>empty>Chr (n=10) vs. Lk>UAS-Chr;UAS-DH44 <sup>RNAi</sup> (n=30)<br><b>empty&gt;Gt (n=10) vs. Lk&gt;Gt (n=19)</b>                                                                                                                                                                                                                                                                                  | 0.2664<br>0.3550<br><b>0.0005</b>                                                                                                        |
| Fig. 2b | Lk (right panel)<br>RNAi ctrl = Lk-GAL4>UAS-Valium (n=20)                                                                                                                                                                                                                                                                                                                                                                                      | One-way ANOVA,<br>F(7,106)=1.973,<br>p=0.0655                                                                                            |
|         | RNAi ctrl vs. AstA-R1 <sup>RNAi</sup> (n=14)<br>RNAi ctrl vs. DH44-R1 <sup>RNAi</sup> (n=10)<br>RNAi ctrl vs. NPFR <sup>RNAi</sup> (n=10)<br>RNAi ctrl vs. Dop1R1 <sup>RNAi</sup> (n=20)<br>RNAi ctrl vs. Dop1R2 <sup>RNAi</sup> (n=10)<br>RNAi ctrl vs. Dop2R <sup>RNAi</sup> (n=20)<br>RNAi ctrl vs. DopEcR <sup>RNAi</sup> (n=10)                                                                                                           | Multiple comparisons<br>not carried out since<br>ANOVA is not<br>significant                                                             |
| Fig. 2c | AstA (left panel)                                                                                                                                                                                                                                                                                                                                                                                                                              | One-way ANOVA,<br>F(4,75)=61.57,<br>p<0.0001                                                                                             |
|         |                                                                                                                                                                                                                                                                                                                                                                                                                                                | Sidak's adjusted p:                                                                                                                      |
|         | <b>empty&gt;Chr (n=10) vs. Chr (n=20)</b><br>empty>Chr (n=10) vs. AstA>UAS-Chr;UAS-AstA <sup>RNAi</sup> (n=20)<br><b>empty&gt;Gt (n=10) vs. AstA&gt;Gt (n=20)</b>                                                                                                                                                                                                                                                                              | <b>&lt;0.0001</b><br>0.9814<br><b>&lt;0.0001</b>                                                                                         |
| Fig. 2c | AstA (right panel)<br>RNAi ctrl = AstA-GAL4>UAS-Valium (n=20)                                                                                                                                                                                                                                                                                                                                                                                  | One-way ANOVA,<br>F(7,90)=4.368,<br>p=0.0003                                                                                             |
|         |                                                                                                                                                                                                                                                                                                                                                                                                                                                | Dunnett's adjusted p:                                                                                                                    |
|         | RNAi ctrl vs. DH44-R1 <sup>RNAi</sup> (n=10)                                                                                                                                                                                                                                                                                                                                                                                                   | 0.9530                                                                                                                                   |



|         |                                                                                                                                                                                                                                                                                                                                                                              |                                                                                  |
|---------|------------------------------------------------------------------------------------------------------------------------------------------------------------------------------------------------------------------------------------------------------------------------------------------------------------------------------------------------------------------------------|----------------------------------------------------------------------------------|
|         | RNAi ctrl vs. Lkr <sup>RNAi</sup> (n=5)<br>RNAi ctrl vs. NPFR <sup>RNAi</sup> (n=13)<br><b>RNAi ctrl vs. Dop1R1<sup>RNAi</sup></b> (n=20)<br>RNAi ctrl vs. Dop1R2 <sup>RNAi</sup> (n=10)<br>RNAi ctrl vs. Dop2R <sup>RNAi</sup> (n=10)<br>RNAi ctrl vs. DopEcR <sup>RNAi</sup> (n=10)                                                                                        | 0.2010<br>0.5986<br><b>0.0005</b><br>0.9998<br>0.9979<br>0.9975                  |
| Fig. 2d | NPF (left panel)                                                                                                                                                                                                                                                                                                                                                             | One-way ANOVA,<br>F(5,89)=11.81,<br>p<0.0001                                     |
|         |                                                                                                                                                                                                                                                                                                                                                                              | Sidak's adjusted p:                                                              |
|         | <b>empty&gt;Chr</b> (n=10) vs. <b>NPF&gt;Chr</b> (n=20)<br>empty>Chr (n=10) vs. NPF>UAS-Chr;UAS-NPFR <sup>RNAi</sup> (n=25)<br>empty>Gt (n=10) vs. NPF>Gt (n=20)                                                                                                                                                                                                             | <b>0.0002</b><br>0.9855<br>0.1928                                                |
| Fig. 2d | NPF (right panel)<br>RNAi ctrl = NPF-GAL4>UAS-Valium (n=20)                                                                                                                                                                                                                                                                                                                  | One-way ANOVA,<br>F(7,127)=3.657,<br>p=0.0012                                    |
|         |                                                                                                                                                                                                                                                                                                                                                                              | Dunnett's adjusted p:                                                            |
|         | RNAi ctrl vs. AstA-R1 <sup>RNAi</sup> (n=15)<br>RNAi ctrl vs. DH44-R1 <sup>RNAi</sup> (n=10)<br><b>RNAi ctrl vs. Lkr<sup>RNAi</sup></b> (n=20)<br><b>RNAi ctrl vs. Dop1R1<sup>RNAi</sup></b> (n=20)<br>RNAi ctrl vs. Dop1R2 <sup>RNAi</sup> (n=20)<br>RNAi ctrl vs. Dop2R <sup>RNAi</sup> (n=20)<br>RNAi ctrl vs. DopEcR <sup>RNAi</sup> (n=10)                              | 0.4148<br>0.9972<br><b>0.0188</b><br><b>0.0026</b><br>0.1588<br>0.9212<br>0.9910 |
| Fig. 2e | DH44 (left panel)                                                                                                                                                                                                                                                                                                                                                            | One-way ANOVA,<br>F(4,75)=10.54,<br>p<0.0001                                     |
|         |                                                                                                                                                                                                                                                                                                                                                                              | Sidak's adjusted p:                                                              |
|         | empty>Chr (n=10) vs. DH44>Chr (n=20)<br>empty>Chr (n=10) vs. DH44>UAS-Chr;UAS-DH44 <sup>RNAi</sup> (n=20)<br><b>empty&gt;Gt</b> (n=10) vs. <b>DH44&gt;Gt</b> (n=20)                                                                                                                                                                                                          | 0.1591<br>0.9807<br><b>&lt;0.0001</b>                                            |
| Fig. 2e | DH44 (right panel)<br>RNAi ctrl = DH44-GAL4>UAS-Valium (n=20)                                                                                                                                                                                                                                                                                                                | One-way ANOVA,<br>F(7,141)=5.56,<br>p<0.0001                                     |
|         |                                                                                                                                                                                                                                                                                                                                                                              | Dunnett's adjusted p:                                                            |
|         | RNAi ctrl vs. DH44>AstA-R1 <sup>RNAi</sup> (n=20)<br>RNAi ctrl vs. DH44>Lkr <sup>RNAi</sup> (n=20)<br>RNAi ctrl vs. DH44>NPFR <sup>RNAi</sup> (n=19)<br>RNAi ctrl vs. DH44>Dop1R1 <sup>RNAi</sup> (n=20)<br>RNAi ctrl vs. DH44>Dop1R2 <sup>RNAi</sup> (n=10)<br>RNAi ctrl vs. DH44>Dop2R <sup>RNAi</sup> (n=20)<br><b>RNAi ctrl vs. DH44&gt;DopEcR<sup>RNAi</sup></b> (n=20) | 0.7806<br>0.6273<br>0.9997<br>0.9998<br>0.9996<br>0.9952<br><b>0.0001</b>        |

|         |                                                                                                                                                                                                                                                                                                                                                                                                                                                                                                                                                                                     |                                                                                                                                                     |
|---------|-------------------------------------------------------------------------------------------------------------------------------------------------------------------------------------------------------------------------------------------------------------------------------------------------------------------------------------------------------------------------------------------------------------------------------------------------------------------------------------------------------------------------------------------------------------------------------------|-----------------------------------------------------------------------------------------------------------------------------------------------------|
| Fig. 3a | c205 (left panel)                                                                                                                                                                                                                                                                                                                                                                                                                                                                                                                                                                   | One-way ANOVA,<br>F(14,318)=3.315,<br>p<0.0001                                                                                                      |
|         |                                                                                                                                                                                                                                                                                                                                                                                                                                                                                                                                                                                     | Sidak's adjusted p:                                                                                                                                 |
|         | empty>Chr (n=26) vs. c205>Chr (n=45)<br><b>empty&gt;Gt (n=20) vs. c205&gt;Gt (n=20)</b>                                                                                                                                                                                                                                                                                                                                                                                                                                                                                             | 0.2150<br><b>&lt;0.0001</b>                                                                                                                         |
|         | c205 (right panel)<br>RNAi ctrl = c205-GAL4>UAS-Valium (n=47)                                                                                                                                                                                                                                                                                                                                                                                                                                                                                                                       | Kruskal-Wallis<br>stat=40.85, p<0.0001                                                                                                              |
|         |                                                                                                                                                                                                                                                                                                                                                                                                                                                                                                                                                                                     | Dunn's adjusted p:                                                                                                                                  |
|         | RNAi ctrl vs. AstA <sup>RNAi</sup> (n=20)<br><b>RNAi ctrl vs. AstA-R1<sup>RNAi</sup> (n=20)</b><br>RNAi ctrl vs. DH44 <sup>RNAi</sup> (n=20)<br><b>RNAi ctrl vs. DH44-R1<sup>RNAi</sup> (n=20)</b><br>RNAi ctrl vs. Lk <sup>RNAi</sup> (n=20)<br><b>RNAi ctrl vs. Lkr<sup>RNAi</sup> (n=20)</b><br>RNAi ctrl vs. NPF <sup>RNAi</sup> (n=20)<br>RNAi ctrl vs. NPFR <sup>RNAi</sup> (n=40)<br>RNAi ctrl vs. Dop1R1 <sup>RNAi</sup> (n=20)<br>RNAi ctrl vs. Dop1R2 <sup>RNAi</sup> (n=20)<br>RNAi ctrl vs. Dop2R <sup>RNAi</sup> (n=20)<br>RNAi ctrl vs. DopEcR <sup>RNAi</sup> (n=31) | 0.2550<br><b>0.0131</b><br>0.1245<br><b>0.0001</b><br>0.9999<br><b>0.0011</b><br>0.9999<br>0.9999<br>0.9999<br>0.9999<br>0.9999<br>0.6954<br>0.9999 |
| Fig. 3b | c205 % ate                                                                                                                                                                                                                                                                                                                                                                                                                                                                                                                                                                          | Kruskal-Wallis<br>stat=49.98, p<0.0001                                                                                                              |
|         |                                                                                                                                                                                                                                                                                                                                                                                                                                                                                                                                                                                     | Dunn's adjusted p:                                                                                                                                  |
|         | <b>c205&gt;Chr deprived (n=29) vs. fed (n=10)</b><br><b>c205&gt;Gt deprived (n=20) vs. fed (n=10)</b>                                                                                                                                                                                                                                                                                                                                                                                                                                                                               | <b>&lt;0.0001</b><br><b>&lt;0.0001</b>                                                                                                              |
| Fig. 3c | Food intake<br>empty>Chr (n=10) c205>Chr (n=8)                                                                                                                                                                                                                                                                                                                                                                                                                                                                                                                                      | Kruskal-Wallis<br>stat=3.022, p=0.6966                                                                                                              |
| Fig. 3d | Food intake<br>empty>Gt (n=7), c205>Gt (n=7)                                                                                                                                                                                                                                                                                                                                                                                                                                                                                                                                        | Kruskal-Wallis<br>stat=4.189, p=0.5225                                                                                                              |
| Fig. 3e | Place PI<br>empty>Chr (n=8), c205>Chr (n=20)<br>empty>Gt (n=7), c205>Gt (n=8)                                                                                                                                                                                                                                                                                                                                                                                                                                                                                                       | One-way ANOVA,<br>F(3,39)=2.284, p=0.094                                                                                                            |
| Fig. 4e | Peak $\Delta R/R_0$                                                                                                                                                                                                                                                                                                                                                                                                                                                                                                                                                                 | Kruskal-Wallis<br>stat=56.6, p<0.0001                                                                                                               |
|         |                                                                                                                                                                                                                                                                                                                                                                                                                                                                                                                                                                                     | Wilcoxon matched pairs<br>p:                                                                                                                        |
|         | <b>naïveDeprived sweet (n=10) vs. naïveDeprived<br/>bittersweet (n=10)</b>                                                                                                                                                                                                                                                                                                                                                                                                                                                                                                          | <b>0.0244</b>                                                                                                                                       |
|         | naïveFed sweet (n=12) vs. naïveFed bittersweet (n=12)                                                                                                                                                                                                                                                                                                                                                                                                                                                                                                                               | 0.3110                                                                                                                                              |
|         | <b>choseSweet sweet (n=5) vs. choseSweet bittersweet<br/>(n=5)</b>                                                                                                                                                                                                                                                                                                                                                                                                                                                                                                                  | <b>0.0310</b>                                                                                                                                       |
|         | <b>choseBittersweet sweet (n=5) vs. choseBittersweet<br/>bittersweet (n=5)</b>                                                                                                                                                                                                                                                                                                                                                                                                                                                                                                      | <b>0.0313</b>                                                                                                                                       |
|         | choseNeither sweet (n=10) vs. choseNeither bittersweet<br>(n=10)                                                                                                                                                                                                                                                                                                                                                                                                                                                                                                                    | 0.50                                                                                                                                                |

597

598 **Extended Table 2**

| <b>Figure</b> | <b>Genotype</b>                                                           | <b>Source</b>                                     |
|---------------|---------------------------------------------------------------------------|---------------------------------------------------|
| Fig. 2, 3     | empty = Empty split-GAL4                                                  | FlyLight Robot ID: 3019156                        |
| Fig. 2, 3     | Chr = 20XUAS-CsChrimson (X)                                               | RRID:BDSC_55134                                   |
| Fig. 2, 3     | 20XUAS-CsChrimson (II) for Chr;RNAi experiments                           | RRID:BDSC_55136                                   |
| Fig. 2, 3     | Gt = 20XUAS-GtACR1 (III)                                                  | Rebecca Yang (Duke), A. Claridge-Chang (Duke-NUS) |
| Fig. 2        | Akh-GAL4                                                                  | RRID:BDSC_25684                                   |
| Fig. 2        | AstA-GAL4                                                                 | RRID:BDSC_51979                                   |
| Fig. 2        | Crz-GAL4                                                                  | RRID:BDSC_51976                                   |
| Fig. 2        | DH44-GAL4                                                                 | RRID:BDSC_51987                                   |
| Fig. 2        | Lk-GAL4                                                                   | RRID:BDSC_51993                                   |
| Fig. 2        | NPF-GAL4                                                                  | RRID:BDSC_25682                                   |
| Fig. 2        | Proctolin-GAL4                                                            | RRID:BDSC_51972                                   |
| Fig. 2        | sNPF-GAL4                                                                 | RRID:BDSC_51991                                   |
| Fig. 2        | Tk-GAL4                                                                   | RRID:BDSC_51973                                   |
| Fig. 2        | TH-GAL4 (ple-GAL4)                                                        | RRID:BDSC_8848                                    |
| Fig. 2        | (PPL1) MB504B-GAL4                                                        | RRID:BDSC_68329                                   |
| Fig. 2        | (PPL1) MB065B-GAL4                                                        | RRID:BDSC_68281                                   |
| Fig. 2        | (PAM) 58E02-GAL4                                                          | RRID:BDSC_41347                                   |
| Fig. 2        | Tdc-GAL4                                                                  | RRID:BDSC_9313                                    |
| Fig. 2        | Trh-GAL4                                                                  | RRID:BDSC_38388                                   |
| Fig. 2        | (PPL1- $\gamma 2\alpha'1$ ) MB296B-GAL4 <sup>8,9</sup>                    | RRID:BDSC_68308                                   |
| Fig. 2        | (PPL1- $\alpha 3$ ) MB630B-GAL4 <sup>9</sup>                              | RRID:BDSC_68334                                   |
| Fig. 2        | (PPL1- $\gamma 1$ -pedc) MB320C-GAL4 <sup>9</sup>                         | RRID:BDSC_68253                                   |
| Fig. 2        | (PPL1- $\alpha'2\alpha 2$ ) MB058B-GAL4 <sup>8</sup>                      | RRID:BDSC_68278                                   |
| Fig. 2        | (PPL1- $\alpha'2\alpha 2$ , $\gamma 2\alpha'1$ ) MB099C-GAL4 <sup>9</sup> | RRID:BDSC_68290                                   |
| Fig. 2        | (PAM- $\alpha 1$ ) MB043C-GAL4 <sup>8,9</sup>                             | RRID:BDSC_68363                                   |
| Fig. 2        | (PAM- $\beta 1$ ) MB063B-GAL4 <sup>8,9</sup>                              | RRID:BDSC_68248                                   |
| Fig. 2        | (PAM- $\beta 1\beta 2$ ) MB213B-GAL4 <sup>8,9</sup>                       | RRID:BDSC_68273                                   |
| Fig. 2        | (PAM- $\gamma 5$ ) MB315C-GAL4 <sup>8,9</sup>                             | RRID:BDSC_68316                                   |
| Fig. 2        | (PAM- $\beta'2a$ ) MB109B-GAL4 <sup>8,9</sup>                             | RRID:BDSC_68261                                   |
| Fig. 2        | (PAM- $\gamma 4, \gamma 4 < \gamma 1\gamma 2$ ) MB312C-GAL4 <sup>8</sup>  | RRID:BDSC_68252                                   |
| Fig. 2        | (PAM- $\gamma 3$ ) MB441B-GAL4 <sup>8</sup>                               | RRID:BDSC_68251                                   |
| Fig. 2        | (all KC) MB010B-GAL4 <sup>8</sup>                                         | FlyLight Robot ID: 2135061                        |
| Fig. 2        | ( $\alpha/\beta$ KC) MB008B-GAL4 <sup>8</sup>                             | FlyLight Robot ID: 2135059                        |
| Fig. 2        | ( $\alpha/\beta$ KC) c739-GAL4                                            | RRID:BDSC_7362                                    |
| Fig. 2        | ( $\alpha'/\beta'$ KC) MB005B-GAL4 <sup>8</sup>                           | FlyLight Robot ID: 2135056                        |
| Fig. 2        | ( $\gamma$ -m KC) MB131B-GAL4 <sup>8</sup>                                | FlyLight Robot ID: 2135179                        |
| Fig. 2        | (FBI4,6) ss20-GAL4 (III)                                                  | L. Shao, U. Heberlein, FlyLight                   |

|           |                                     |                                         |
|-----------|-------------------------------------|-----------------------------------------|
| Fig. 2    | (FBI4,6) ss208-GAL4 (III)           | A. Jenett, T. Wolff, G. Rubin, FlyLight |
| Fig. 2    | (FBI4,6) ss225-GAL4 (III)           | A. Jenett, T. Wolff, G. Rubin, FlyLight |
| Fig. 2, 3 | (FBI6) c205-GAL4                    | RRID:BDSC_30826                         |
| Fig. 2    | (FBI2,8,9) 89E07-GAL4 <sup>10</sup> | RRID:BDSC_40553                         |
| Fig. 2    | (FBI5,8,9) 38E07-GAL4 <sup>10</sup> | RRID:BDSC_50007                         |
| Fig. 2    | (ventral FB) 58F03-GAL4             | RRID:BDSC_39187                         |
| Fig. 2    | (FBI1,2) 52G12-GAL4                 | RRID:BDSC_49581                         |
| Fig. 2, 3 | UAS-Valium                          | RRID:BDSC_35786                         |
| Fig. 2, 3 | UAS-Lk-RNAi <sup>11-14</sup>        | RRID:BDSC_25798                         |
| Fig. 2, 3 | UAS-Lkr-RNAi <sup>11,13,15</sup>    | RRID:BDSC_25936                         |
| Fig. 2, 3 | UAS-AstA-RNAi <sup>14,16</sup>      | RRID:BDSC_25866                         |
| Fig. 2, 3 | UAS-AstA-R1-RNAi <sup>17</sup>      | RRID:BDSC_27280                         |
| Fig. 2, 3 | UAS-NPF-RNAi <sup>14,18,19</sup>    | RRID:BDSC_27237                         |
| Fig. 2, 3 | UAS-NPFR-RNAi <sup>13,19-21</sup>   | RRID:BDSC_25939                         |
| Fig. 2, 3 | UAS-DH44-RNAi <sup>14,22,23</sup>   | RRID:BDSC_25804                         |
| Fig. 2, 3 | UAS-DH44-R1-RNAi <sup>22</sup>      | RRID:BDSC_28780                         |
| Fig. 2, 3 | UAS-Dop1R1-RNAi <sup>21</sup>       | RRID:BDSC_62193                         |
| Fig. 2, 3 | UAS-Dop1R2-RNAi <sup>21</sup>       | RRID:BDSC_65997                         |
| Fig. 2, 3 | UAS-Dop2R-RNAi <sup>21</sup>        | RRID:BDSC_26001                         |
| Fig. 2, 3 | UAS-DopEcR-RNAi <sup>21</sup>       | RRID:BDSC_31981                         |
| Fig. 4    | (FBI6) 84C10-GAL4                   | RRID:BDSC_48378                         |
| Fig. 4    | UAS-GCaMP6f;UAS-tdTomato            | D. Clark, Yale University               |

599

600 **Extended Table 3 (Extended figure statistics):**

| Figure      | Datasets compared                                               | Statistics                             |
|-------------|-----------------------------------------------------------------|----------------------------------------|
| Ext Fig. 3b | 84C10-GAL4 Preference index                                     | One-way ANOVA, F(3,50)=7.823, p=0.0002 |
|             |                                                                 | Sidak's adjusted p:                    |
|             | 84C10>Valium (n=17) vs. 84C10>Chr (n=17)                        | 0.1463                                 |
|             | <b>84C10&gt;Valium (n=10) vs. 84C10&gt;Gt (n=10)</b>            | <b>0.0034</b>                          |
| Ext Fig. 3c | 84C10-GAL4 % ate                                                | One-way ANOVA, F(3,55)=186.1, p<0.0001 |
|             |                                                                 | Sidak's adjusted p:                    |
|             | <b>deprived 84C10&gt;Chr (n=17) vs. fed 84C10&gt;Chr (n=15)</b> | <b>&lt;0.0001</b>                      |
|             | <b>deprived 84C10&gt;Gt (n=20) vs. fed 84C10&gt;Gt (n=7)</b>    | <b>&lt;0.0001</b>                      |

601

602

603

604 **Extended references**

- 605 1 Perkins, L. A. *et al.* The Transgenic RNAi Project at Harvard Medical School: Resources  
606 and Validation. *Genetics* **201**, 843-852, doi:10.1534/genetics.115.180208 (2015).
- 607 2 Ni, J. Q. *et al.* A Drosophila resource of transgenic RNAi lines for neurogenetics.  
608 *Genetics* **182**, 1089-1100, doi:10.1534/genetics.109.103630 (2009).
- 609 3 Wong, R., Piper, M. D., Wertheim, B. & Partridge, L. Quantification of food intake in  
610 Drosophila. *PLoS One* **4**, e6063, doi:10.1371/journal.pone.0006063 (2009).
- 611 4 Deshpande, S. A. *et al.* Quantifying Drosophila food intake: comparative analysis of  
612 current methodology. *Nat Methods* **11**, 535-540, doi:10.1038/nmeth.2899 (2014).
- 613 5 Xu, C. S. *et al.* A Connectome of the Adult *Drosophila* Central Brain.  
614 *bioRxiv*, 2020.2001.2021.911859, doi:10.1101/2020.01.21.911859 (2020).
- 615 6 Jody, C. *et al.* *NeuronBridge Codebase*. (2020).
- 616 7 Meissner, G. W. *et al.* An image resource of subdivided *Drosophila* GAL4-  
617 driver expression patterns for neuron-level searches. *bioRxiv*, 2020.2005.2029.080473,  
618 doi:10.1101/2020.05.29.080473 (2020).
- 619 8 Aso, Y. *et al.* The neuronal architecture of the mushroom body provides a logic for  
620 associative learning. *Elife* **3**, e04577, doi:10.7554/eLife.04577 (2014).
- 621 9 Aso, Y. & Rubin, G. M. Dopaminergic neurons write and update memories with cell-  
622 type-specific rules. *Elife* **5**, doi:10.7554/eLife.16135 (2016).
- 623 10 Hu, W. *et al.* Fan-Shaped Body Neurons in the Drosophila Brain Regulate Both Innate  
624 and Conditioned Nociceptive Avoidance. *Cell Rep* **24**, 1573-1584,  
625 doi:10.1016/j.celrep.2018.07.028 (2018).
- 626 11 Cavey, M., Collins, B., Bertet, C. & Blau, J. Circadian rhythms in neuronal activity  
627 propagate through output circuits. *Nat Neurosci* **19**, 587-595, doi:10.1038/nn.4263  
628 (2016).
- 629 12 Murphy, K. R. *et al.* Postprandial sleep mechanics in Drosophila. *Elife* **5**,  
630 doi:10.7554/eLife.19334 (2016).
- 631 13 Senapati, B. *et al.* A neural mechanism for deprivation state-specific expression of  
632 relevant memories in Drosophila. *Nat Neurosci* **22**, 2029-2039, doi:10.1038/s41593-019-  
633 0515-z (2019).
- 634 14 Lee, J. H., Bassel-Duby, R. & Olson, E. N. Heart- and muscle-derived signaling system  
635 dependent on MED13 and Wingless controls obesity in Drosophila. *Proc Natl Acad Sci U*  
636 *S A* **111**, 9491-9496, doi:10.1073/pnas.1409427111 (2014).
- 637 15 Zandawala, M. *et al.* Modulation of Drosophila post-feeding physiology and behavior by  
638 the neuropeptide leucokinin. *PLoS Genet* **14**, e1007767,  
639 doi:10.1371/journal.pgen.1007767 (2018).
- 640 16 Schiemann, R. *et al.* Identification and In Vivo Characterisation of Cardioactive Peptides  
641 in Drosophila melanogaster. *Int J Mol Sci* **20**, doi:10.3390/ijms20010002 (2018).
- 642 17 Yu, Y. *et al.* Regulation of starvation-induced hyperactivity by insulin and glucagon  
643 signaling in adult Drosophila. *Elife* **5**, doi:10.7554/eLife.15693 (2016).
- 644 18 Guevara, A., Gates, H., Urbina, B. & French, R. Developmental Ethanol Exposure  
645 Causes Reduced Feeding and Reveals a Critical Role for Neuropeptide F in Survival.  
646 *Front Physiol* **9**, 237, doi:10.3389/fphys.2018.00237 (2018).

- 647 19 Ameku, T. *et al.* Midgut-derived neuropeptide F controls germline stem cell proliferation  
648 in a mating-dependent manner. *PLoS Biol* **16**, e2005004,  
649 doi:10.1371/journal.pbio.2005004 (2018).
- 650 20 Tsao, C. H., Chen, C. C., Lin, C. H., Yang, H. Y. & Lin, S. *Drosophila* mushroom bodies  
651 integrate hunger and satiety signals to control innate food-seeking behavior. *Elife* **7**,  
652 doi:10.7554/eLife.35264 (2018).
- 653 21 Klose, M. & Shaw, P. Sleep-drive reprograms clock neuronal identity through CREB-  
654 binding protein induced PDFR expression. *bioRxiv*, 2019.2012.2012.874628,  
655 doi:10.1101/2019.12.12.874628 (2019).
- 656 22 King, A. N. *et al.* A Peptidergic Circuit Links the Circadian Clock to Locomotor  
657 Activity. *Curr Biol* **27**, 1915-1927 e1915, doi:10.1016/j.cub.2017.05.089 (2017).
- 658 23 Cannell, E. *et al.* The corticotropin-releasing factor-like diuretic hormone 44 (DH44) and  
659 kinin neuropeptides modulate desiccation and starvation tolerance in *Drosophila*  
660 *melanogaster*. *Peptides* **80**, 96-107, doi:10.1016/j.peptides.2016.02.004 (2016).

661

## 662 **Extended figure legends**

663 **Extended Fig. 1. Wild-type fly behavior. a**, w1118 flies always prefer higher sucrose  
664 concentration when no quinine is present. **b**, Food preference is sucrose concentration ratio  
665 dependent between two food options when quinine concentration is kept constant in the  
666 bittersweet food. **c**, Most w1118 flies ate at 21 h food deprivation, with almost 100% eating at  
667 the no-preference 50 mM sucrose condition. Plots depict mean with  $\pm 95\%$  CI; violins show data  
668 distribution.

669

670 **Extended Fig. 2. a**, Percent of flies that ate during the optogenetic screen for all the genotypes  
671 tested. **b**, only ~4% of the flies eat when Lk neurons were activated (Lk>Chr) and this effect is  
672 abolished (~57% ate) by knocking down Lk in the same neurons during activation (Lk>Chr;Lk-  
673 RNAi). Plots depict mean with  $\pm 95\%$  CI; violins show data distribution.

674

675 **Extended Fig. 3. 84C10-GAL4 characterization. a**, 84C10-GAL4 shows high baseline  
676 GCaMP6f fluorescence. Images shown are raw fluorescence images from the same frame without

677 background subtraction. **b**, 84C10-GAL4 shows the same behavioral phenotype as c205-GAL4  
678 when optogenetically activated (84C10>Chr) and inhibited (84C10>Gt) compared to controls.  
679 Flies prefer bittersweet food compared to control flies when FBl6 neurons are inhibited. **c**, Fed  
680 flies do not eat on FBl6 activation or inhibition and **d-e**, the total consumption as well as sweet  
681 and bittersweet consumption is not different between flies in the same trial on activation (**d**) or  
682 inhibition (**e**). **f**, Neither activation nor inhibition of FBl6 is inherently rewarding or aversive  
683 since there is no significant difference in place preference without food. **f**, Mean water response  
684 ( $\Delta R/R_0$ ) of flies with different past experience. Plots depict mean with  $\pm 95\%$  CI; violins show  
685 data distribution. See Extended Table 3 for statistics.  $p < 0.00001 = ****$ ,  $p < 0.0001 = ***$ ,  
686  $p < 0.01 = **$ ,  $p < 0.05 = *$ .



## Figure 1

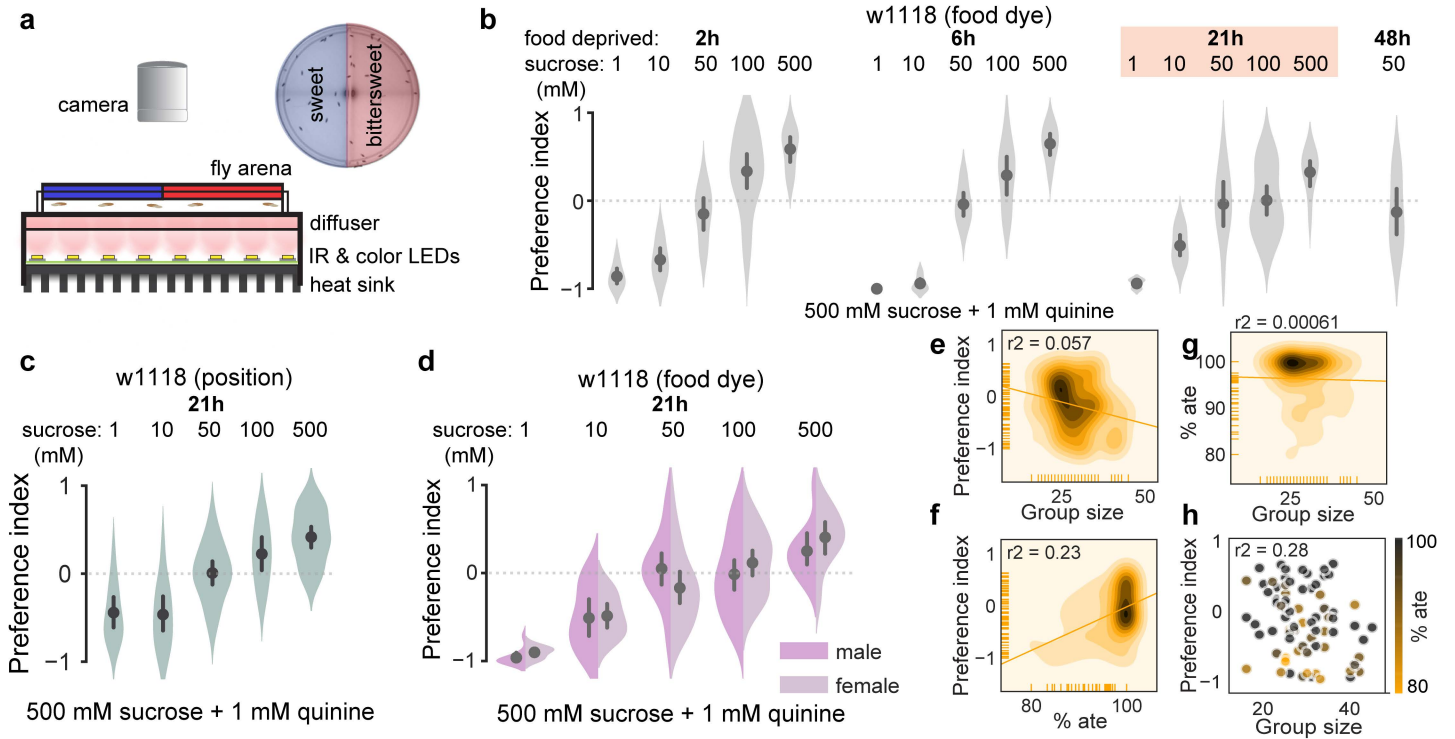



**Figure 2**

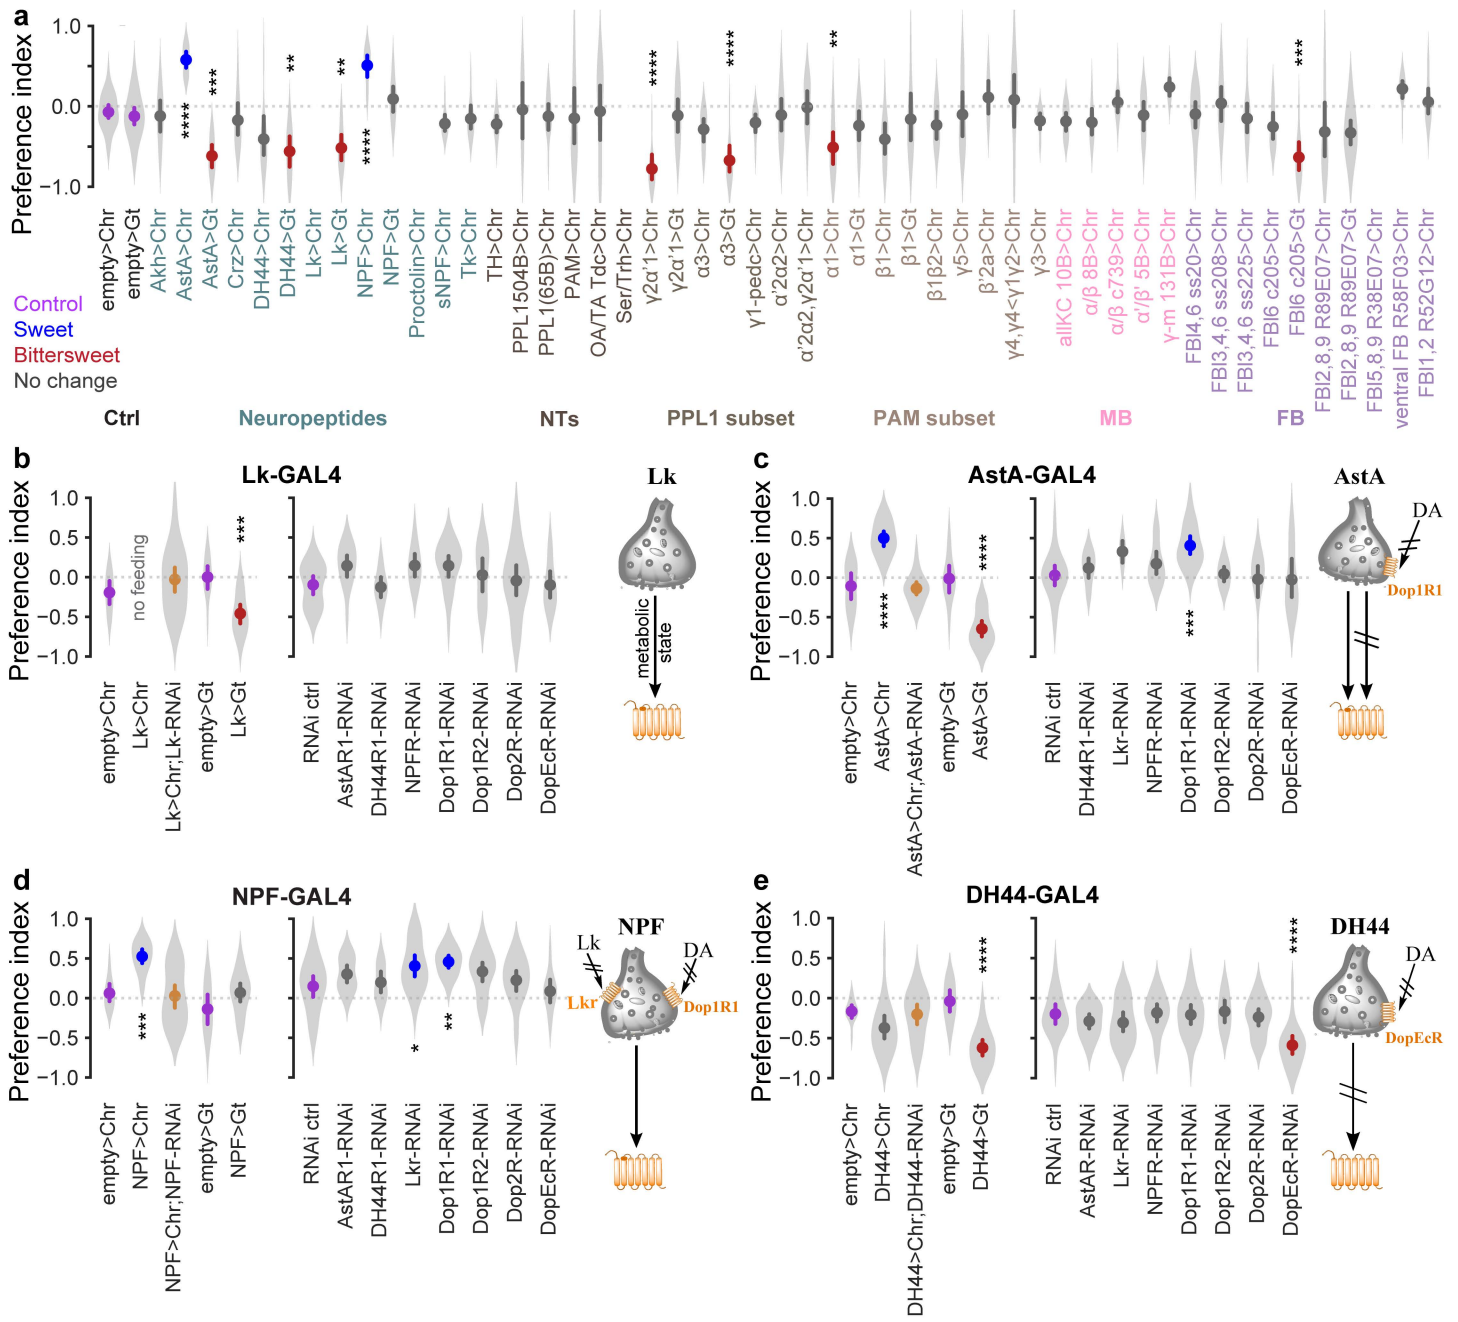

Figure 3

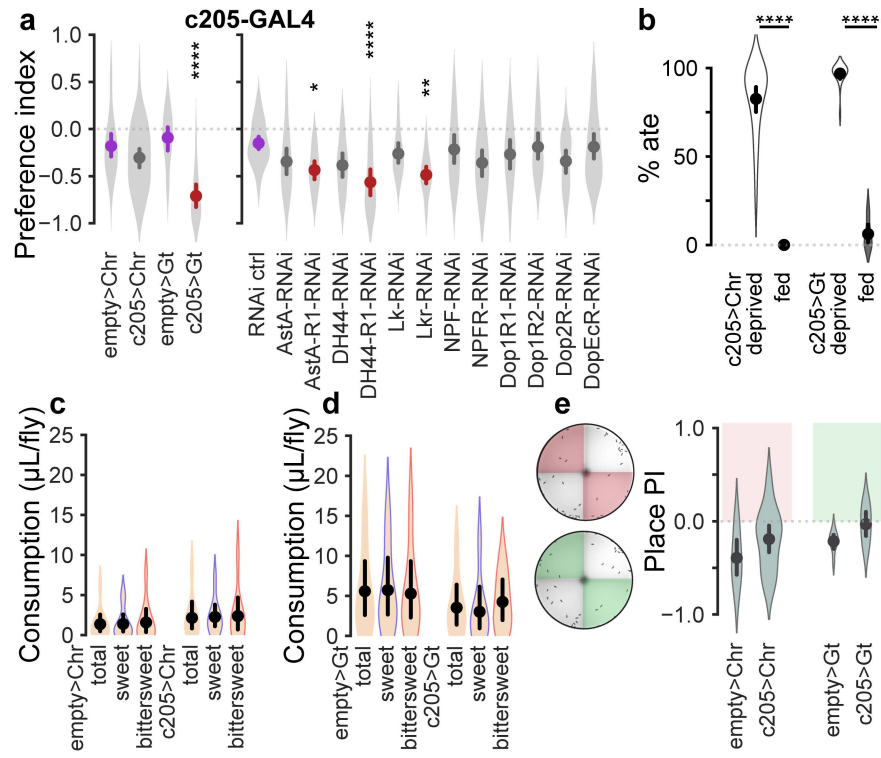

**Figure 4**

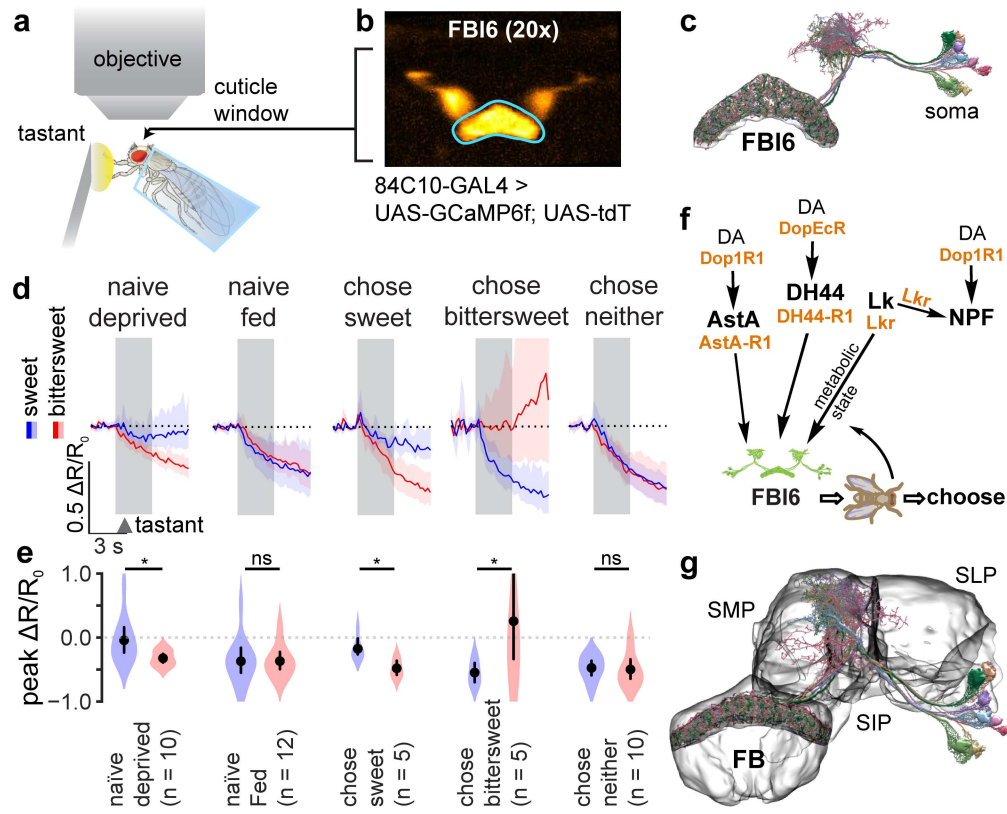

## Extended figure 1

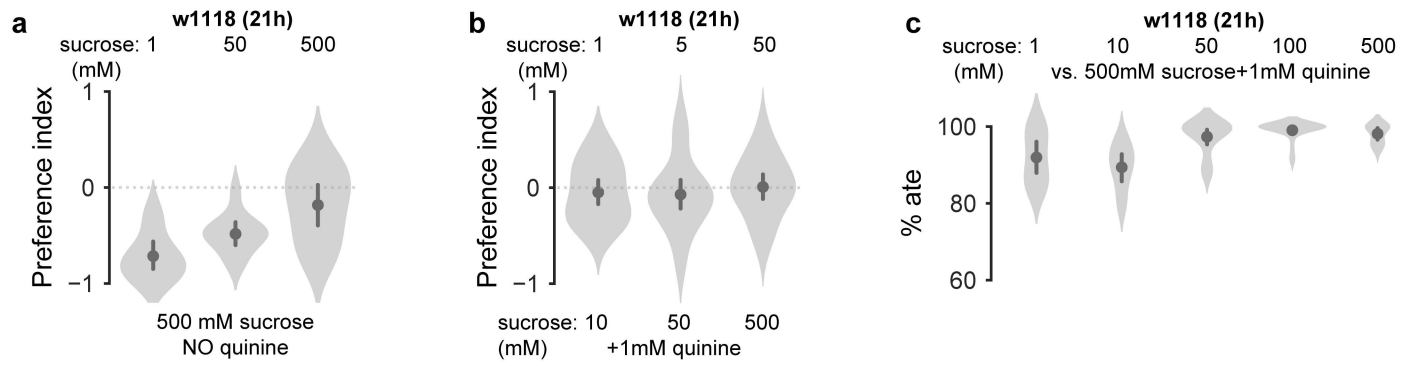

## Extended figure 2

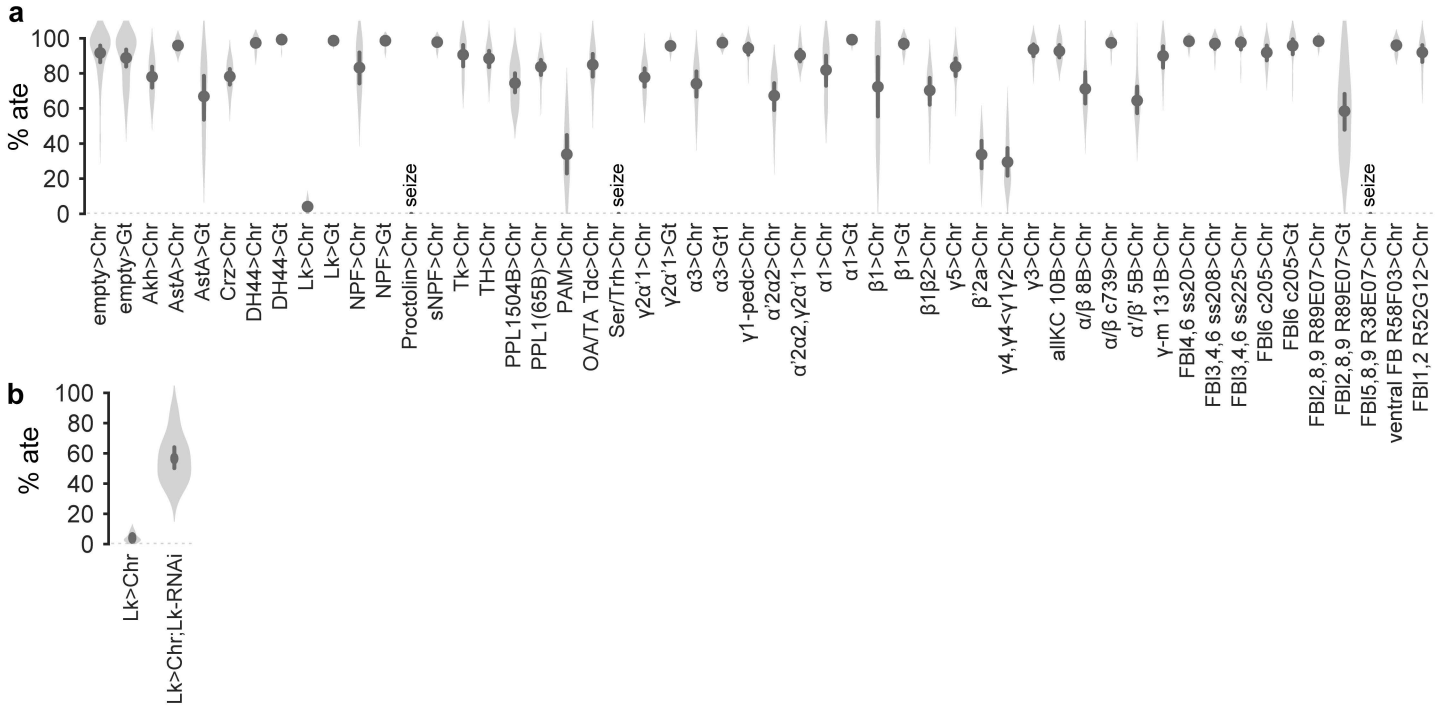

### Extended figure 3

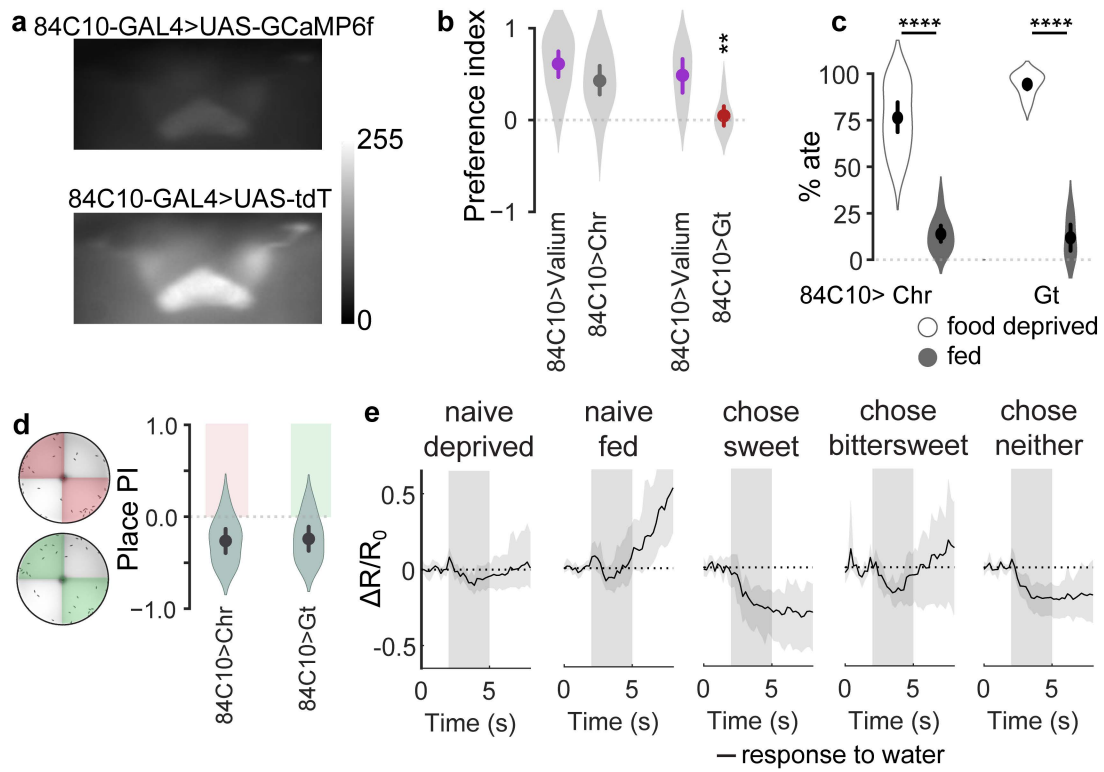

Source: https://www.biorxiv.org/content/10.1101/2020.08.14.251553v1.full.pdf
